# Supplementary material for: Inhaled Sedation in Patients with COVID-19-Related Acute Respiratory Distress Syndrome: An International Retrospective Study
Source: J Clin Med. 2022 Dec 20;12(1):12. doi: 10.3390/jcm12010012 (PMC9821008; doi:10.3390/jcm12010012)
Supplement: Supplementary file 1 [file jcm-12-00012-s001.zip › Supplementary Materials.pdf]

## Supplementary Materials

### Complete list of the ISCA Study Group Members

Dominique Morand, Elodie Caumon, Lucile Borao, Nathalie Bourguignon, Raiko Blondonnet, Bruno Pereira, Randy Coupet, Matthieu Jabaudon (Clermont-Ferrand, France); Martin Schläpfer, Sabine Kern, Beatrice Beck-Schimmer (Zurich, Switzerland); Thomas A. Neff, Nadine Hungerbuehler (Muensterlingen, Switzerland); Pierre Boucher, Taïssia Lelekov-Boissard (Saint-Etienne, France); Pierre Bailly, Erwan L'Her (Brest, France); Martin Bellgardt (Bochum, Germany); Rafael Badenes, Jose Carbonell, Berta Monleón (Valencia, Spain); Tobias Becher, Nina Schulz-Ruhtenberg, Corinna Buchholz, Risto Radczewski (Kiel, Germany); Caroline Varillon (Dunkerque, France); Jean-Michel Constantin (Paris, France); Ronny Munoz Acun, Thy Nguyen, Brian O'Gara (Boston, USA).

### Supplementary Figure Legends:

- **Figure S1.** Modes of invasive mechanical ventilation on study days 0–7 in the patients who received inhaled sedation for at least 24 h (inhaled sedation group) and those who received intravenous sedation only (intravenous sedation group) through day 28.
- **Figure S2.** Adjunctive therapies for acute respiratory distress syndrome used on study days 0–7 in the patients who received inhaled sedation for at least 24 h (inhaled sedation group) and those who received intravenous sedation only (intravenous sedation group) through day 28. RM: recruitment maneuvers; NMB: neuromuscular blockade; NO: inhaled nitric oxide; ECMO: extracorporeal membrane oxygenation.
- **Figure S3.** Agents of sedation used on study days 0–7 in the patients who received inhaled sedation for at least 24 h (inhaled sedation group) and those who received intravenous sedation only (intravenous sedation group) through day 28.
- **Figure S4.** Components of the ABCDEF bundle implemented on study days 0–7 in the patients who received inhaled sedation for at least 24 h (inhaled sedation group) and those who received intravenous sedation only (intravenous sedation group) through day 28. The “C” component of the bundle (choice of analgesia and sedation) is not shown as it was not captured as a binary variable; details on analgesia and sedation are provided elsewhere.

### Supplementary Tables

- **Table S1.** List of participating centers, number of patients included per center, and number of patients who died by day 28 in each center.
- **Table S2.** Demographics and medical history.
- **Table S3.** Univariate analysis of the primary endpoint using demographic variables, variables from past medical history, variables from the day before inclusion, and variables from the day of inclusion.
- **Table S4.** Baseline variables integrated in the propensity score that was used to predict probability of receiving inhaled sedation or not, and derived from the fitted regression model (logistic regression).
- **Table S5.** Selected characteristics (demographics, medical history, data from study day 0) according to treatment assignment (inhaled versus intravenous sedation) in propensity-matched patients.
- **Table S6.** Primary and secondary endpoints according to treatment assignment (inhaled versus intravenous sedation) in propensity-matched patients.
- **Table S7.** Sensitivity analysis of the primary endpoint (ventilator-free days through day 28) when defining groups based on the length of inhaled sedation received ( $\geq 2$ ,  $\geq 3$ ,  $\geq 4$ ,  $\geq 5$ ,  $\geq 7$  or  $\geq 10$  days).
- **Table S8.** Subgroup unadjusted analysis of the primary endpoint (ventilator-free days through day 28).
- **Table S9.** Mechanical ventilation data and adjunctive ARDS therapies received during the first seven days after inclusion.
- **Table S10.** Physiological measures of lung function and ventilator settings through day 7 in patients receiving inhaled sedation and those receiving intravenous sedation only.
- **Table S11.** Sedation practices and measures from the ABCDEF bundle implemented during the first seven days after inclusion.

## Materials and Methods

### *Study Design, Population, and Data Collection*

This retrospective, observational, multicenter study was conducted at 10 university and non-university hospitals in France, Germany, Spain, Switzerland, and the United States (**Table S1, Supplementary Materials**). This study was registered on ClinicalTrials.gov (identifier, NCT04383730) on May 12, 2020, prior to patient enrollment and performed in accordance with the STrengthening the Reporting of OBservational studies in Epidemiology (STROBE) statement (**Supplementary Digital Content 1**) [1]. The study protocol is provided in the **Supplementary Digital Content 2**.

Consecutive adult patients admitted to a participating ICU (or any other ICU-like setting deployed in response to the COVID-19 pandemic, such as an operating room, post-anesthesia care unit, step-down unit or any COVID-19-specific unit) for severe COVID-19 (suspected or confirmed) and requiring invasive mechanical ventilation and sedation between March 2020 and May 2021 were included. There were no exclusion criteria. As this was a non-interventional study, sedation practices were those routinely used in the participating centers; the choice and doses of the sedative agent (intravenous or inhaled) were as per each center's clinical standards. The patients were divided into two groups: those who received inhaled sedation for at least 24 hours and those who received only intravenous sedation within 28 days of enrollment.

De-identified, clinico-biological data routinely recorded in the patient health record, and relevant information on COVID-19, including specific therapies, were retrospectively collected by investigators or clinical research associates in REDCap electronic data capture tools (Vanderbilt University) hosted at CHU Clermont-Ferrand, France [2]. The patients were followed up to 28 days after enrollment in the study, with day 0 (baseline) defined as the day when patients were admitted to a participating center, invasively ventilated, and receiving sedation.

### *Ethics and Consent*

The study protocol was approved by ethics committees from France (Comité d'Éthique pour la Recherche en Anesthésie et Réanimation, Société Française d'Anesthésie et de Réanimation, IRB 00010254-2020-050), Germany (Ethikkommission der medizinischen Fakultät der Christian-Albrechts-Universität zu Kiel, approval D471/20), Spain (Comité de Ética de la Investigación con Medicamentos del Hospital Clínico Universitario de Valencia, approval SAS/3470/2009), Switzerland (Business Administration System for Ethics Committees No. 2020-01448), and the United States (Beth Israel Deaconess Medical Center, 2020P000326). Signed informed consent for this retrospective study was waived by ethics committees. All data were collected anonymously.

### *Endpoints*

#### *Primary Endpoint*

The primary outcome was the number of ventilator-free days through day 28, considering death as a competing event (the patients who died within 28 days were assigned zero ventilator-free days). A period of assisted breathing lasting less than 24 hours or for surgical purposes was not considered for ventilator-free days calculation.

#### *Secondary Endpoints*

The secondary outcome measures were: all-cause mortality at day 28; the number of ICU-free days through day 28; the duration of invasive mechanical ventilation through day 28; the duration of controlled mechanical ventilation through day 28; physiological measures of lung function and ventilator settings on study days 0–7; the duration of vasopressor support and continuous neuromuscular blockade and the need for and duration of renal replacement therapy through day 28; the use of prone position and adjuvant interventions for severe ARDS (e.g., recruitment maneuvers, inhaled nitric oxide, high frequency ventilation, and extracorporeal membrane oxygenation) through day 7; and the

type, duration, and modalities of sedation practices on study days 0–7 (including the implementation of measures from the ABCDEF bundle) [3] and through day 28.

### Statistical analyses

Analyses were performed with Stata version 15 (StataCorp) and *R: a language and environment for statistical computing* (v 3.6.3) [4]. Statistical significance was established by a P value of 0.05 using two-sided hypothesis tests. We did not correct for multiple comparisons and results should be interpreted as exploratory. No missing data were imputed.

For the primary analysis of ventilator-free days through day 28, zero-inflated negative binomial regression was performed, and the results were expressed with 95% confidence intervals (CI) as the odds ratio (OR) for having zero ventilator-free days through day 28 and the incidence rate ratio (IRR) for the number of ventilator-free days through day 28 when not zero. We also analyzed the primary endpoint using zero-inflated negative binomial regression after adjustment for the site (as a random effect) and the covariates determined according to the univariate results and clinical relevance (age, a medical history of arterial hypertension, and the partial pressure of arterial oxygen [ $\text{PaO}_2$ ] to fraction of inspired oxygen [ $\text{FiO}_2$ ] ratio, the need for vasopressor support, the documentation of an agitation-sedation scale by the bedside nurse, and serum creatinine at baseline). To maximize the number of complete cases in the multivariable analysis, these covariates were not included when the number of available individuals was <75% of the total study population. Subgroup analyses of the primary endpoint were performed after the interaction between the treatment (inhaled vs. intravenous sedation) and the predefined subgroups was tested as follows: in the patients with mild ARDS ( $\text{PaO}_2/\text{FiO}_2 < 300$  mmHg) at baseline; in the patients with severe ARDS ( $\text{PaO}_2/\text{FiO}_2 < 100$  mmHg) at baseline; in the patients receiving a specific agent for inhaled sedation (isoflurane or sevoflurane) at baseline; in the patients receiving a specific agent for intravenous sedation (propofol, midazolam, dexmedetomidine or other) at baseline; in the patients with shock (defined as the need for intravenous vasopressor infusion to maintain arterial pressure) at baseline; in the patients who required inhaled sedation for 5 days or more; and in the patients included in an ICU-like setting (i.e., any non-ICU setting that may be deployed to manage critically ill patients as a result of the COVID-19 pandemic, such as an operating room, a post-anesthesia care unit, or a step-down unit). To account for selection bias and potential confounders in the evaluation of the primary endpoint, propensity score matching was performed using the predicted probability of the group (inhaled or intravenous sedation) derived from the fitted logistic regression model regression, with the covariates identified as clinically relevant after the univariate analysis included in the propensity score model. The propensity score was used to compare the variables and outcomes in a cohort of propensity-matched patients and as a covariate in the multivariable analyses. Because we initially constructed the inhaled sedation and intravenous sedation groups based on whether they had received at least 24 hours of inhaled sedation or only received intravenous sedation through day 28, sensitivity analyses of the primary endpoint were also performed considering distinct durations of inhaled sedation ( $\geq 2$ ,  $\geq 3$ ,  $\geq 4$ ,  $\geq 5$ ,  $\geq 7$ , or  $\geq 10$  days) for the patients in the inhaled sedation group.

The continuous parameters were compared between the groups using Student's t-test or the Mann-Whitney U test after normality was assessed by the Shapiro-Wilk test and homoscedasticity using the Fisher-Snedecor test. The results were expressed as regression coefficients and 95% CI. When appropriate, logarithmic transformation was used to achieve normality of the dependent outcome. Longitudinal analysis of repeated data (such as the measures of lung function through day 7) was performed using mixed models to study the fixed effects group, the time point evaluation, and their interaction considering between- and within-subject variability. The categorical variables were analyzed using the chi-squared test or Fisher's exact test, as appropriate, and the results were expressed as relative risks and 95% CI.

Given that estimates for the effects of inhaled sedation on major outcomes are scarce and available only in a few patients with non-COVID-19 ARDS [5], it was impossible to

estimate a robust sample size from an expected difference in the primary outcome between the patients receiving inhaled sedation and those receiving intravenous sedation. However, it seemed that, given the number of centers involved, enrolling 150–450 patients would be feasible and relevant to assess the primary endpoint while exploring the secondary endpoints.

#### Mechanical ventilation modes (invasive) in intravenous sedation group

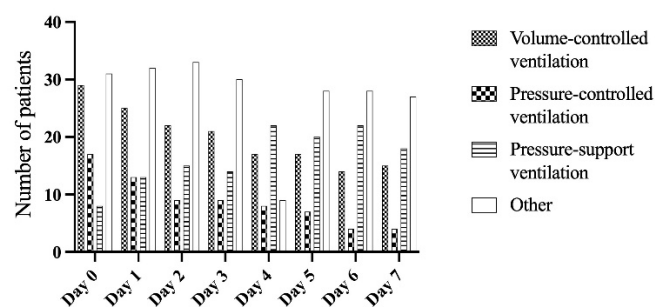

#### Mechanical ventilation modes (invasive) in inhaled sedation group

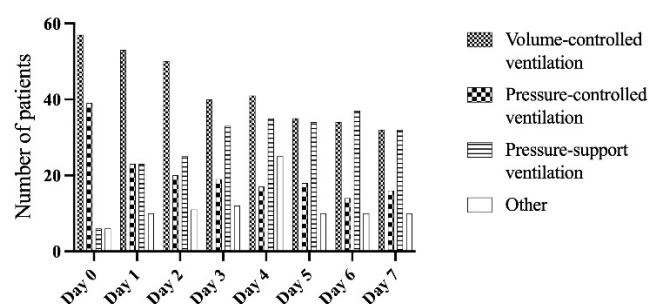

**Figure S1.** Modes of invasive mechanical ventilation on study days 0–7 in the patients who received inhaled sedation for at least 24 h (inhaled sedation group) and those who received intravenous sedation only (intravenous sedation group) through day 28.

### Adjunctive therapies: intravenous sedation group

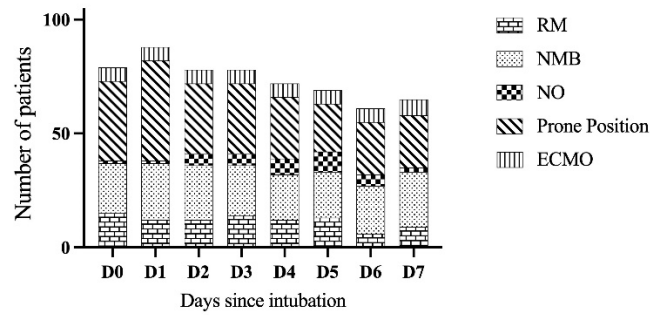

### Adjunctive therapies: inhaled sedation group

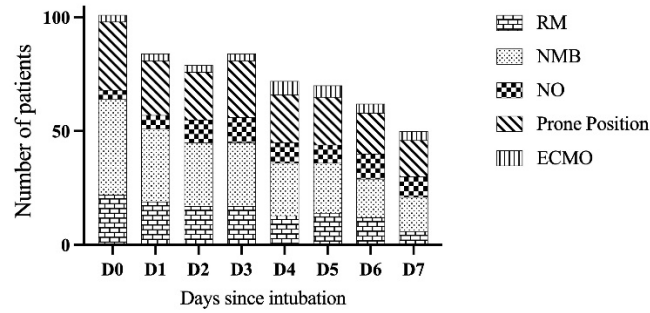

**Figure S2.** Adjunctive therapies for acute respiratory distress syndrome used on study days 0–7 in the patients who received inhaled sedation for at least 24 h (inhaled sedation group) and those who received intravenous sedation only (intravenous sedation group) through day 28. RM: recruitment maneuvers; NMB: neuromuscular blockade; NO: inhaled nitric oxide; ECMO: extracorporeal membrane oxygenation.

### Agents of sedation: intravenous sedation group

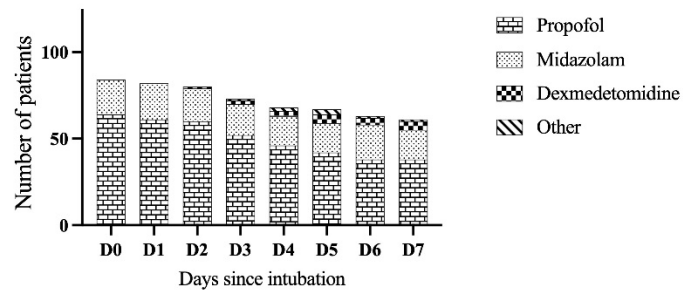

### Agents of sedation: inhaled sedation group

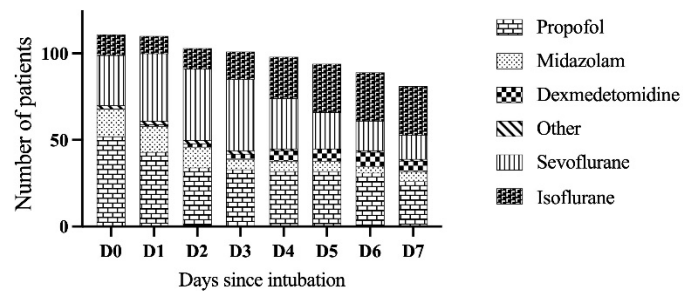

**Figure S3.** Agents of sedation used on study days 0–7 in the patients who received inhaled sedation for at least 24 h (inhaled sedation group) and those who received intravenous sedation only (intravenous sedation group) through day 28.

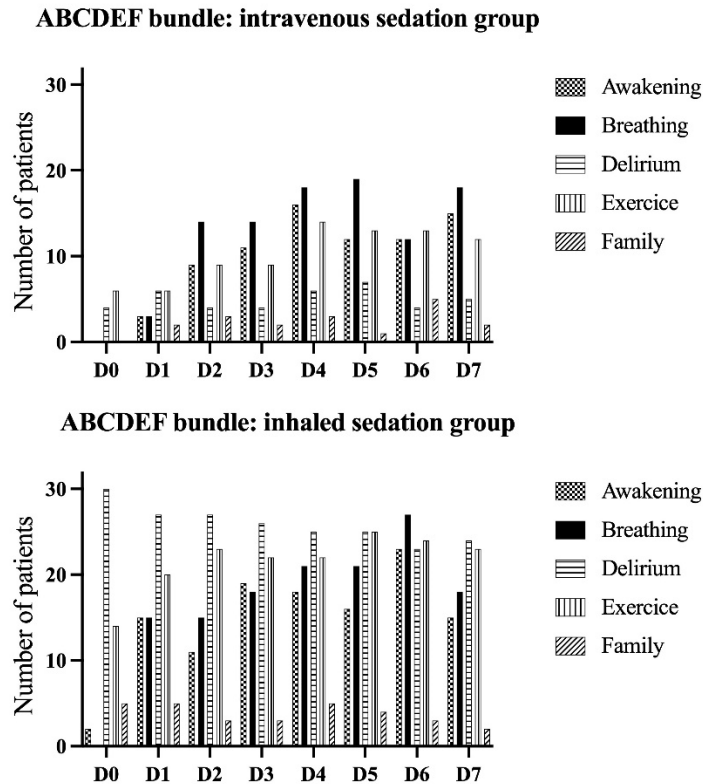

**Figure S4.** Components of the ABCDEF bundle implemented on study days 0–7 in the patients who received inhaled sedation for at least 24 h (inhaled sedation group) and those who received intravenous sedation only (intravenous sedation group) through day 28. The “C” component of the bundle (choice of analgesia and sedation) is not shown as it was not captured as a binary variable; details on analgesia and sedation are provided elsewhere.

**Table S1.** List of participating centers, number of patients included per center, and number of patients who died by day 28 in each center.

| Center                                                                   | Principal Investigator | Patients included, n | Patients who died by day 28, n (%) |
|--------------------------------------------------------------------------|------------------------|----------------------|------------------------------------|
| University Clinic Hospital, Valencia, Spain                              | Rafael Badenes         | 12                   | 2 (17)                             |
| Brest Regional University Hospital, France                               | Pierre Bailly          | 19                   | 3 (16)                             |
| Clermont-Ferrand University Hospital, France                             | Matthieu Jabaudon      | 17                   | 12 (71)                            |
| Dunkerque Hospital, Dunkerque, France                                    | Caroline Varillon      | 7                    | 4 (57)                             |
| Ramsay Santé Private Hospital de la Loire, Saint-Etienne, France         | Pierre Boucher         | 24                   | 7 (29)                             |
| University Hospital of Ruhr, Bochum, Germany                             | Martin Bellgardt       | 8                    | 4 (50)                             |
| University Medical Center Schleswig-Holstein, Campus Kiel, Kiel, Germany | Tobias Becher          | 10                   | 6 (60)                             |
| University Hospital, Zurich, Switzerland                                 | Martin Schläpfer       | 52                   | 11 (21)                            |
| Cantonal Hospital Münsterlingen, Münsterlingen, Switzerland              | Thomas A. Neff         | 40                   | 16 (40)                            |
| Beth Israel Deaconess Medical Center, Boston, USA                        | Brian O’Gara           | 7                    | 6 (86)                             |

Percentages may not sum to 100% due to rounding.

Table S2. Demographics and medical history.

| Variable                                              | No. of Available Individuals | Whole Cohort (n=196) | Inhaled Sedation (n=111) | Intravenous Sedation (n=85) | P Value* |
|-------------------------------------------------------|------------------------------|----------------------|--------------------------|-----------------------------|----------|
| <b>Demographics</b>                                   |                              |                      |                          |                             |          |
| Age, mean $\pm$ SD                                    | 196                          | 66 $\pm$ 9           | 67 $\pm$ 10              | 66 $\pm$ 9                  | 0.37     |
| Men, n (%)                                            | 194                          | 150 (77)             | 84 (76)                  | 66 (79)                     | 0.71     |
| Body mass index, median (IQR), kg/m <sup>2</sup>      | 193                          | 28.1 [24.8; 31.8]    | 28.7 [24.8; 31.9]        | 27.1 [24.7; 31.8]           | 0.85     |
| <b>Comorbidities, No. (%)</b>                         |                              |                      |                          |                             |          |
| Cigarette smoking status                              | 193                          |                      |                          |                             | 0.15     |
| Current smoker                                        |                              | 22 (11)              | 13 (12)                  | 9 (11)                      |          |
| Past-smoker                                           |                              | 42 (21)              | 26 (24)                  | 16 (19)                     |          |
| Never smoked                                          |                              | 84 (44)              | 52 (47)                  | 32 (39)                     |          |
| Unknown                                               |                              | 45 (23)              | 19 (17)                  | 26 (31)                     |          |
| Daily alcohol intake                                  | 142                          |                      |                          |                             | 0.002    |
| No                                                    |                              | 135 (70)             | 83 (75)                  | 52 (63)                     |          |
| Yes                                                   |                              | 7 (4)                | 7 (4)                    | 0 (0)                       |          |
| Unknown                                               |                              | 50 (26)              | 20 (18)                  | 30 (37)                     |          |
| Myocardial infarction                                 | 196                          | 16 (8)               | 8 (7)                    | 8 (9)                       | 0.58     |
| Chronic heart failure                                 | 194                          | 24 (12)              | 13 (12)                  | 11 (13)                     | 0.83     |
| Hypertension                                          | 195                          | 129 (66)             | 75 (68)                  | 54 (64)                     | 0.54     |
| Peripheral vascular disease                           | 194                          | 10 (5)               | 6 (5)                    | 4 (5)                       | 0.83     |
| Cerebrovascular accident or transient ischemic attack | 196                          | 15 (8)               | 6 (5)                    | 9 (11)                      | 0.18     |
| Presence of sequelae                                  | 15                           | 7 (47)               | 2 (33)                   | 5 (56)                      | 0.40     |
| Hemiplegia                                            | 195                          | 3 (2)                | 0 (0)                    | 3 (4)                       | 0.08     |
| Dementia                                              | 196                          | 3 (2)                | 3 (3)                    | 0 (0)                       | 0.13     |
| COPD                                                  | 195                          | 17 (9)               | 11 (10)                  | 6 (7)                       | 0.47     |
| Asthma                                                | 195                          | 9 (5)                | 6 (5)                    | 3 (4)                       | 0.55     |
| Connective tissue disease                             | 195                          | 3 (2)                | 3 (3)                    | 0 (0)                       | 0.13     |
| Peptic ulcer disease                                  | 195                          | 3 (2)                | 3 (3)                    | 0 (0)                       | 0.13     |
| Chronic liver disease                                 | 178                          | 4 (2)                | 3 (3)                    | 1 (1)                       | 0.59     |
| Diabetes mellitus                                     | 173                          |                      |                          |                             | 0.03     |
| Uncomplicated                                         |                              | 26 (15)              | 17 (18)                  | 9 (11)                      |          |
| End-organ damage                                      |                              | 14 (8)               | 3 (3)                    | 11 (14)                     |          |
| Type 2 diabetes                                       | 194                          | 67 (35)              | 38 (35)                  | 29 (35)                     | 0.99     |
| Moderate to severe chronic kidney disease             | 196                          | 22 (11)              | 6 (5)                    | 16 (19)                     | 0.003    |
| Solid tumor                                           | 182                          |                      |                          |                             | 0.67     |
| Localized                                             |                              | 11 (12)              | 11 (11)                  | 10 (13)                     |          |
| Metastatic                                            |                              | 3 (2)                | 1 (1)                    | 2 (3)                       |          |
| Leukemia                                              | 196                          | 2 (1)                | 1 (1)                    | 1 (1)                       | 0.85     |
| Lymphoma                                              | 195                          | 3 (2)                | 2 (2)                    | 1 (1)                       | 0.72     |
| AIDS                                                  | 195                          | 1 (1)                | 1 (1)                    | 0 (0)                       | 0.56     |
| Arthritis                                             | 194                          | 4 (2)                | 2 (2)                    | 2 (2)                       | 0.77     |
| Mc Cabe score                                         | 134                          |                      |                          |                             | 0.35     |
| Non fatal disease                                     |                              | 123 (92)             | 62 (91)                  | 61 (92)                     |          |
| Ultimately fatal disease                              |                              | 9 (7)                | 4 (6)                    | 5 (8)                       |          |
| Rapidly fatal disease                                 |                              | 2 (1)                | 2 (3)                    | 0 (0)                       |          |
| <b>Medication, n (%)</b>                              |                              |                      |                          |                             |          |
| Corticosteroids                                       | 193                          | 23 (12)              | 11 (10)                  | 12 (15)                     | 0.01     |
| Inhaled                                               |                              | 5 (22)               | 4 (36)                   | 1 (8)                       |          |
| Oral low dose                                         |                              | 13 (57)              | 6 (55)                   | 7 (58)                      |          |
| Oral high dose                                        |                              | 5 (22)               | 1 (9)                    | 4 (33)                      |          |
| Immuno-modulatory/-suppressant in the last 3 months   | 190                          | 16 (8)               | 6 (5)                    | 10 (13)                     | 0.01     |
| ACE inhibitors                                        | 196                          | 39 (20)              | 24 (22)                  | 15 (18)                     | 0.49     |
| Angiotensin II receptor inhibitors                    | 196                          | 32 (16)              | 21 (19)                  | 11 (13)                     | 0.26     |
| Statins                                               | 196                          | 53 (27)              | 30 (27)                  | 23 (27)                     | 0.99     |
| Proton pump inhibitors                                | 196                          | 36 (18)              | 23 (21)                  | 13 (15)                     | 0.33     |

\* P values were calculated for comparisons between patients receiving inhaled sedation (for at least 24 hours) and those receiving only intravenous sedation through day 28. Percentages are expressed out of available individuals for each variable, and may not sum to 100% due to rounding. SD: standard deviation; IQR: interquartile

range; COPD: chronic obstructive pulmonary disease; AIDS: acquired immunodeficiency syndrome; ACE: angiotensin converting enzyme.

**Table S3.** Univariate analysis of the primary endpoint using demographic variables, variables from past medical history, variables from the day before inclusion, and variables from the day of inclusion.

|                                                                 | Univariate analysis<br>(Kruskal–Wallis or correlation coefficient) |                  |                                                   | Univariate analysis<br>(Zero-inflated negative binomial regression) |                                                                    |                                                                          |
|-----------------------------------------------------------------|--------------------------------------------------------------------|------------------|---------------------------------------------------|---------------------------------------------------------------------|--------------------------------------------------------------------|--------------------------------------------------------------------------|
|                                                                 | VFD28,<br>median [IQR]<br>or correlation coefficient               | <i>P</i>         | Patients<br>with zero<br>VFD28=0,<br><i>n</i> (%) | OR [95%CI]<br>for having zero VFD28,<br><i>P</i> value              | VFD28 if<br>VFD28≠0,<br>median [IQR]<br>or correlation coefficient | IRR [95%CI]<br>for the number of VFD28<br>if not zero,<br><i>P</i> value |
| <b>Demographics</b>                                             |                                                                    |                  |                                                   |                                                                     |                                                                    |                                                                          |
| Gender                                                          |                                                                    |                  |                                                   |                                                                     |                                                                    |                                                                          |
| Male                                                            | 0 [0; 13] (n=147)                                                  | 0.96             | 90 (61)                                           | reference                                                           | 17 [8; 21] (n=57)                                                  | reference                                                                |
| Female                                                          | 0 [0; 12] (n=44)                                                   |                  | 26 (59)                                           | 0.91 [0.46; 1.82], <i>P</i> = 0.79                                  | 14 [5; 20] (n=18)                                                  | 0.91 [0.46; 1.82], <i>P</i> = 0.41                                       |
| Age, years                                                      | <i>Rho</i> = -0.2866<br>(n=193)                                    | 10 <sup>-4</sup> | 117 (61)                                          | 1.06 [1.02; 1.09], <i>P</i> = 0.001                                 | <i>Rho</i> = -0.1293<br>(n=76)                                     | 1.01 [0.99; 1.03], <i>P</i> = 0.19                                       |
| Body mass index,<br>kg/m <sup>2</sup>                           | <i>Rho</i> = -0.0141<br>(n=190)                                    | 0.85             | 114 (60)                                          | 0.99 [0.94; 1.04], <i>P</i> = 0.71                                  | <i>Rho</i> = -0.0238<br>(n=76)                                     | 0.99 [0.97; 1.02], <i>P</i> = 0.92                                       |
| <b>Medical History</b>                                          |                                                                    |                  |                                                   |                                                                     |                                                                    |                                                                          |
| Smoking status                                                  |                                                                    |                  |                                                   |                                                                     |                                                                    |                                                                          |
| Current smoker                                                  | 0 [0; 19] (n=22)                                                   | 0.62             | 13 (59)                                           | reference                                                           | 20 [16; 22] (n=9)                                                  | reference                                                                |
| Past-smoker                                                     | 0 [0; 4] (n=41)                                                    |                  | 28 (68)                                           | 1.49 [0.51; 4.35], <i>P</i> = 0.47                                  | 15 [7; 18] (n=13)                                                  | 1.34 [0.79; 2.27], <i>P</i> = 0.27                                       |
| Never smoked                                                    | 0 [0; 14] (n=83)                                                   |                  | 50 (60)                                           | 1.05 [0.40; 2.73], <i>P</i> = 0.92                                  | 18 [12; 23] (n=33)                                                 | 1.10 [0.70; 1.73], <i>P</i> = 0.68                                       |
| Unknown                                                         | 0 [0; 7] (n=44)                                                    |                  | 26 (55)                                           | 0.99 [0.35; 2.81], <i>P</i> = 0.99                                  | 13 [5; 17] (n=18)                                                  | 1.61 [0.98; 2.65], <i>P</i> = 0.06                                       |
| Daily alcohol intake                                            |                                                                    |                  |                                                   |                                                                     |                                                                    |                                                                          |
| No                                                              | 0 [0; 14] (n=134)                                                  | 0.37             | 83 (62)                                           | reference                                                           | 18 [12; 23] (n=51)                                                 | reference                                                                |
| Yes                                                             | 0 [0; 0] (n=7)                                                     |                  | 6 (86)                                            | 3.67 [0.43; 31.50], <i>P</i> = 0.24                                 | 12 [12; 12] (n=1)                                                  | 1.38 [0.40; 4.90], <i>P</i> = 0.61                                       |
| Unknown                                                         | 0 [0; 6] (n=48)                                                    |                  | 28 (58)                                           | 0.85 [0.43; 2.29], <i>P</i> = 0.64                                  | 11 [4; 18] (n=20)                                                  | 1.51 [1.08; 2.10], <i>P</i> = 0.02                                       |
| Arterial hypertension                                           |                                                                    |                  |                                                   |                                                                     |                                                                    |                                                                          |
| No                                                              | 3 [0; 15] (n=65)                                                   | 0.02             | 31 (48)                                           | reference                                                           | 15 [7; 22] (n=34)                                                  | reference                                                                |
| Yes                                                             | 0 [0; 8] (n=127)                                                   |                  | 85 (67)                                           | 2.23 [1.21; 4.14], <i>P</i> = 0.01                                  | 17 [8; 20] (n=42)                                                  | 0.95 [0.71; 1.28], <i>P</i> = 0.75                                       |
| Myocardial infarction                                           |                                                                    |                  |                                                   |                                                                     |                                                                    |                                                                          |
| No                                                              | 0 [0; 13] (n=177)                                                  | 0.38             | 106 (60)                                          | reference                                                           | 16 [8; 21] (n=71)                                                  | reference                                                                |
| Yes                                                             | 0 [0; 2] (n=16)                                                    |                  | 11 (69)                                           | 1.46 [0.49; 4.42], <i>P</i> = 0.50                                  | 14 [2; 18] (n=5)                                                   | 1.26 [0.69; 2.29], <i>P</i> = 0.46                                       |
| Chronic heart failure                                           |                                                                    |                  |                                                   |                                                                     |                                                                    |                                                                          |
| No                                                              | 0 [0; 13] (n=167)                                                  | 0.20             | 98 (59)                                           | reference                                                           | 16 [8; 21] (n=69)                                                  | reference                                                                |
| Yes                                                             | 0 [0; 4] (n=24)                                                    |                  | 17 (71)                                           | 1.71 [0.67; 4.35], <i>P</i> = 0.26                                  | 14 [6; 18] (n=7)                                                   | 1.17 [0.70; 1.95], <i>P</i> = 0.54                                       |
| Peripheral vascular<br>disease                                  |                                                                    |                  |                                                   |                                                                     |                                                                    |                                                                          |
| No                                                              | 0 [0; 13] (n=181)                                                  | 0.34             | 110 (61)                                          | reference                                                           | 16 [8; 20] (n=71)                                                  | reference                                                                |
| Yes                                                             | 0 [0; 1] (n=10)                                                    |                  | 7 (70)                                            | 1.46 [0.36; 5.93], <i>P</i> = 0.60                                  | 5 [1; 16] (n=3)                                                    | 2.08 [0.92; 4.71], <i>P</i> = 0.08                                       |
| Cerebrovascular acci-<br>dent or transient is-<br>chemic attack |                                                                    |                  |                                                   |                                                                     |                                                                    |                                                                          |
| No                                                              | 0 [0; 13] (n=178)                                                  | 0.20             | 106 (60)                                          | reference                                                           | 16 [8; 21] (n=72)                                                  | reference                                                                |
| Yes                                                             | 0 [0; 2] (n=15)                                                    |                  | 11 (73)                                           | 1.86 [0.57; 6.05], <i>P</i> = 0.31                                  | 10 [2; 19] (n=4)                                                   | 1.48 [0.76; 2.92], <i>P</i> = 0.26                                       |
| Dementia                                                        |                                                                    |                  |                                                   |                                                                     |                                                                    |                                                                          |
| No                                                              | 0 [0; 13] (n=190)                                                  | 0.79             | 115 (61)                                          | reference                                                           | 16 [8; 21] (n=75)                                                  | reference                                                                |

|                           |                   |      |          |                                  |                    |                               |
|---------------------------|-------------------|------|----------|----------------------------------|--------------------|-------------------------------|
| Yes                       | 0 [0; 2] (n=3)    |      | 2 (67)   | 1.30 [0.12; 14.73], $P = 0.83$   | 14 [14; 14] (n=1)  | 1.06 [0.29; 3.88], $P = 0.93$ |
| Hemiplegia                |                   |      |          |                                  |                    |                               |
| No                        | 0 [0; 13] (n=189) | 0.48 | 115 (61) | reference                        | 16 [8; 21] (n=74)  | reference                     |
| Yes                       | 2 [0; 20] (n=3)   |      | 1 (33)   | 0.20 [0.03; 3.74], $P = 0.36$    | 11 [2; 20] (n=2)   | 1.36 [0.53; 3.51], $P = 0.52$ |
| COPD                      |                   |      |          |                                  |                    |                               |
| No                        | 0 [0; 13] (n=175) | 0.18 | 103 (59) | reference                        | 16 [8; 21] (n=72)  | reference                     |
| Yes                       | 0 [0; 0] (n=17)   |      | 13 (76)  | 2.27 [0.71; 7.29], $P = 0.17$    | 18 [10; 21] (n=4)  | 0.97 [0.50; 1.87], $P = 0.93$ |
| Asthma                    |                   |      |          |                                  |                    |                               |
| No                        | 0 [0; 13] (n=183) | 0.49 | 111 (61) | reference                        | 16 [8; 21] (n=72)  | reference                     |
| Yes                       | 0 [0; 3] (n=9)    |      | 6 (67)   | 1.27 [0.30; 5.31], $P = 0.75$    | 5 [3; 17] (n=3)    | 1.84 [0.83; 4.10], $P = 0.14$ |
| Connective tissue disease |                   |      |          |                                  |                    |                               |
| No                        | 0 [0; 12] (n=189) | 0.84 | 115 (61) | reference                        | 16 [8; 20] (n=74)  | reference                     |
| Yes                       | 0 [0; 16] (n=3)   |      | 2 (67)   | 1.28 [0.11; 14.57], $P = 0.84$   | 16 [16; 16] (n=1)  | 0.92 [0.25; 3.34], $P = 0.90$ |
| Peptic ulcer disease      |                   |      |          |                                  |                    |                               |
| No                        | 0 [0; 13] (n=189) | 0.18 | 113 (60) | reference                        | 16 [8; 21] (n=76)  | reference                     |
| Yes                       | 0 [0; 0] (n=3)    |      | 3 (2)    | NR                               | (n=0)              | NR                            |
| Chronic liver disease     |                   |      |          |                                  |                    |                               |
| None                      | 0 [0; 13] (n=171) | 0.29 | 101 (59) | reference                        | 16 [8; 20] (n=70)  | reference                     |
| Mild                      | 0 [0; 0] (n=3)    |      | 3 (100)  | NR                               | (n=0)              | NR                            |
| Moderate/severe           | 0 [0; 0] (n=1)    |      | 1 (100)  | NR                               | (n=0)              | NR                            |
| Type 1 diabetes           |                   |      |          |                                  |                    |                               |
| None                      | 0 [0; 14] (n=131) | 0.36 | 73 (56)  | reference                        | 16 [8; 20] (n=58)  | reference                     |
| Uncomplicated             | 0 [0; 12] (n=25)  |      | 17 (68)  | 1.70 [0.68; 4.22], $P = 0.25$    | 19 [15; 23] (n=8)  | 0.81 [0.50; 1.31], $P = 0.38$ |
| End-organ damage          | 0 [0; 2] (n=14)   |      | 10 (71)  | 1.97 [0.58; 6.66], $P = 0.27$    | 11 [4; 19] (n=4)   | 0.92 [0.66; 2.64], $P = 0.43$ |
| Type 2 diabetes           |                   |      |          |                                  |                    |                               |
| No                        | 0 [0; 14] (n=126) | 0.30 | 72 (57)  | reference                        | 16 [8; 22] (n=52)  | reference                     |
| Yes                       | 0 [0; 8] (n=65)   |      | 42 (65)  | 1.28 [0.69; 2.39], $P = 0.44$    | 13 [7; 19] (n=23)  | 1.13 [0.82; 1.55], $P = 0.47$ |
| Chronic kidney disease    |                   |      |          |                                  |                    |                               |
| No                        | 0 [0; 13] (n=171) | 0.09 | 100 (58) | reference                        | 16 [8; 21] (n=71)  | reference                     |
| Yes                       | 0 [0; 0] (n=22)   |      | 17 (77)  | 2.41 [0.85; 6.89], $P = 0.10$    | 17 [8; 18] (n=5)   | 1.10 [0.60; 1.99], $P = 0.76$ |
| Solid tumor               |                   |      |          |                                  |                    |                               |
| None                      | 0 [0; 13] (n=158) | 0.98 | 93 (59)  | reference                        | 16 [8; 20] (n=62)  | reference                     |
| Localized                 | 0 [0; 5] (n=21)   |      | 12 (57)  | 0.88 [0.35; 2.23], $P = 0.79$    | 6 [4; 20] (n=9)    | 1.23 [0.77; 1.97], $P = 0.39$ |
| Metastatic                | 0 [0; 28] (n=3)   |      | 2 (67)   | 1.34 [0.12; 15.18], $P = 0.81$   | 28 [28; 28] (n=1)  | 0.53 [0.15; 1.86], $P = 0.32$ |
| Leukemia                  |                   |      |          |                                  |                    |                               |
| No                        | 0 [0; 13] (n=191) | 0.27 | 115 (60) | reference                        | 16 [8; 21] (n=76)  | reference                     |
| Yes                       | 0 [0; 0] (n=2)    |      | 2 (100)  | NR                               | (n=0)              | NR                            |
| Lymphoma                  |                   |      |          |                                  |                    |                               |
| No                        | 0 [0; 13] (n=189) | 0.18 | 113 (60) | reference                        | 16 [8; 21] (n=76)  | reference                     |
| Yes                       | 0 [0; 0] (n=3)    |      | 3 (100)  | NR                               | (n=0)              | NR                            |
| AIDS                      |                   |      |          |                                  |                    |                               |
| No                        | 0 [0; 13] (n=191) | 0.44 | 115 (60) | reference                        | 16 [8; 21] (n=76)  | reference                     |
| Yes                       | 0 [0; 0] (n=1)    |      | 1 (100)  | NR                               | (n=0)              | NR                            |
| Arthritis                 |                   |      |          |                                  |                    |                               |
| No                        | 0 [0; 12] (n=187) | 0.52 | 114 (61) | reference                        | 16 [8; 21] (n=73)  | reference                     |
| Yes                       | 9 [0; 19] (n=4)   |      | 2 (50)   | 0.64 [0.09; 4.71], $P = 0.64$    | 19 [18; 20] (n=2)  | 0.77 [0.31; 1.92], $P = 0.57$ |
| Other comorbidity         |                   |      |          |                                  |                    |                               |
| No                        | 2 [0; 18] (n=94)  | 0.00 | 45 (48)  | reference                        | 17 [8; 21] (n=49)  | reference                     |
| Yes                       | 0 [0; 12] (n=97)  | 2    | 71 (73)  | 2.97 [1.63; 5.47], $P < 10^{-4}$ | 15 [12; 20] (n=26) | 1.02 [0.74; 1.39], $P = 0.92$ |

|                                                   |                              |       |          |                                     |                             |                                    |
|---------------------------------------------------|------------------------------|-------|----------|-------------------------------------|-----------------------------|------------------------------------|
| Mc Cabe score                                     |                              |       |          |                                     |                             |                                    |
| Nonfatal disease                                  | 0 [0; 17] (n=120)            | 0.19  | 61 (51)  | reference                           | 17 [7; 21] (n=59)           | reference                          |
| Ultimately fatal disease                          | 0 [0; 0] (n=9)               |       | 7 (78)   | NR                                  | 17 [5; 28] (n=2)            | NR                                 |
| Rapidly fatal disease                             | 0 [0; 0] (n=2)               |       | 2 (100)  | NR                                  | (n=0)                       | NR                                 |
|                                                   |                              |       |          |                                     |                             |                                    |
| Corticosteroid therapy                            |                              |       |          |                                     |                             |                                    |
| No                                                | 0 [0; 13] (n=153)            | 0.91  | 91 (59)  | reference                           | 16 [8; 21] (n=62)           | reference                          |
| Yes                                               | 0 [0; 13] (n=23)             |       | 14 (61)  | 1.06 [0.43; 2.61], <i>P</i> = 0.90  | 17 [8; 19] (n=9)            | 1.06 [0.67; 1.67], <i>P</i> = 0.82 |
| Unknown                                           | 0 [0; 5] (n=14)              |       | 9 (64)   | 1.22 [0.39; 3.85], <i>P</i> = 0.73  | 14 [15; 21] (n=5)           | 1.08 [0.60; 1.97], <i>P</i> = 0.78 |
|                                                   |                              |       |          |                                     |                             |                                    |
| Immunosuppressant therapy                         |                              |       |          |                                     |                             |                                    |
| No                                                | 0 [0; 13] (n=152)            | 0.50  | 89 (59)  | reference                           | 16 [8; 20] (n=63)           | reference                          |
| Yes                                               | 0 [0; 19] (n=16)             |       | 9 (56)   | 0.91 [0.88; 2.59], <i>P</i> = 0.87  | 19 [16; 25] (n=7)           | 0.77 [0.47; 1.26], <i>P</i> = 0.30 |
| Unknown                                           | 0 [0; 2] (n=19)              |       | 13 (68)  | 1.52 [0.55; 4.25], <i>P</i> = 0.42  | 10 [2; 21] (n=6)            | 1.25 [0.72; 2.16], <i>P</i> = 0.44 |
|                                                   |                              |       |          |                                     |                             |                                    |
| Treatment with ACE inhibitors                     |                              |       |          |                                     |                             |                                    |
| No                                                | 0 [0; 12] (n=155)            | 0.33  | 97 (63)  | reference                           | 16 [8; 21] (n=58)           | reference                          |
| Yes                                               | 0 [0; 16] (n=38)             |       | 20 (53)  | 0.66 [0.32; 1.36], <i>P</i> = 0.26  | 17 [6; 20] (n=18)           | 1.05 [0.74; 1.49], <i>P</i> = 0.78 |
|                                                   |                              |       |          |                                     |                             |                                    |
| Treatment with angiotensin II receptor inhibitors |                              |       |          |                                     |                             |                                    |
| No                                                | 0 [0; 13] (n=162)            | 0.60  | 96 (59)  | reference                           | 16 [7; 20] (n=66)           | reference                          |
| Yes                                               | 0 [0; 13] (n=31)             |       | 21 (68)  | 1.45 [0.64; 3.28], <i>P</i> = 0.37  | 19 [13; 25] (n=10)          | 0.80 [0.52; 1.22], <i>P</i> = 0.29 |
|                                                   |                              |       |          |                                     |                             |                                    |
| Treatment with statins                            |                              |       |          |                                     |                             |                                    |
| No                                                | 0 [0; 13] (n=140)            | 0.28  | 82 (59)  | reference                           | 16 [8; 21] (n=58)           | reference                          |
| Yes                                               | 0 [0; 5] (n=53)              |       | 35 (66)  | 1.37 [0.71; 2.66], <i>P</i> = 0.35  | 17 [5; 20] (n=18)           | 1.11 [0.79; 1.57], <i>P</i> =0.55  |
|                                                   |                              |       |          |                                     |                             |                                    |
| Treatment with proton pump inhibitors             |                              |       |          |                                     |                             |                                    |
| No                                                | 0 [0; 13] (n=157)            | 0.84  | 96 (61)  | reference                           | 16 [8; 20] (n=61)           | reference                          |
| Yes                                               | 0 [0; 12] (n=36)             |       | 21 (58)  | 0.89 [0.42; 1.86], <i>P</i> = 0.75  | 16 [5; 21] (n=15)           | 1.07 [0.74; 1.55], <i>P</i> = 0.73 |
|                                                   |                              |       |          |                                     |                             |                                    |
| Data from day 0 (baseline)                        |                              |       |          |                                     |                             |                                    |
|                                                   |                              |       |          |                                     |                             |                                    |
| Body temperature, °C                              | <i>Rho</i> = 0.0014 (n=111)  | 0.98  | 75 (68)  | 0.88 [0.65; 1.19], <i>P</i> = 0.39  | <i>Rho</i> = 0.0014 (n=75)  | 1.06 [0.90; 1.25], <i>P</i> = 0.48 |
|                                                   |                              |       |          |                                     |                             |                                    |
| Heart rate, bpm                                   | <i>Rho</i> = -0.0354 (n=190) | 0.63  | 115 (61) | 1.00 [0.99; 1.02], <i>P</i> = 0.66  | <i>Rho</i> = -0.1351 (n=75) | 1.00 [1.00; 1.01], <i>P</i> = 0.26 |
|                                                   |                              |       |          |                                     |                             |                                    |
| Mean arterial blood pressure, mmHg                | <i>Rho</i> = 0.0284 (n=187)  | 0.70  | 115 (61) | 1.00 [0.98; 1.02], <i>P</i> = 0.94  | <i>Rho</i> = 0.1186 (n=72)  | 1.00 [0.99; 1.01], <i>P</i> = 0.44 |
|                                                   |                              |       |          |                                     |                             |                                    |
| Supraventricular tachycardia                      |                              |       |          |                                     |                             |                                    |
| No                                                | 0 [0; 14] (n=178)            | 0.01  | 103 (58) | reference                           | 16 [8; 21] (n=75)           | reference                          |
| Yes                                               | 0 [0; 0] (n=10)              |       | 10 (100) | NR                                  | (n=0)                       | NR                                 |
|                                                   |                              |       |          |                                     |                             |                                    |
| Atrial fibrillation                               |                              |       |          |                                     |                             |                                    |
| No                                                | 0 [0; 14] (n=176)            | 0.02  | 101 (57) | reference                           | 16 [8; 21] (n=75)           | reference                          |
| Yes                                               | 0 [0; 0] (n=8)               |       | 8 (100)  | NR                                  | (n=0)                       | NR                                 |
|                                                   |                              |       |          |                                     |                             |                                    |
| Need for vasopressor support                      |                              |       |          |                                     |                             |                                    |
| No                                                | 7 [0; 18] (n=40)             | 0.001 | 15 (37)  | reference                           | 17 [11; 20] (n=25)          | reference                          |
| Yes                                               | 0 [0; 8] (n=150)             |       | 99 (66)  | 3.25 [1.57; 6.75], <i>P</i> = 0.002 | 15 [7; 21] (n=51)           | 1.06 [0.78; 1.45], <i>P</i> = 0.70 |
|                                                   |                              |       |          |                                     |                             |                                    |
| Urine output, n (%)                               |                              |       |          |                                     |                             |                                    |
| >0.5 mL/kg/h                                      | 0 [0; 15] (n=134)            | 0.18  | 75 (56)  | reference                           | 17 [7; 22] (n=59)           | reference                          |
| <0.5 mL/kg/h for 6-12 h                           | 0 [0; 12] (n=15)             |       | 9 (60)   | 1.17 [0.39; 3.51], <i>P</i> = 0.77  | 13 [12; 14] (n=6)           | 1.19 [0.68; 2.08], <i>P</i> = 0.55 |

|                                                                          |                                 |      |          |                                      |                                |                                       |
|--------------------------------------------------------------------------|---------------------------------|------|----------|--------------------------------------|--------------------------------|---------------------------------------|
| <0.5 ml/kg/h for ≥12 h                                                   | 0 [0; 0] (n=20)                 |      | 16 (75)  | 3.16 [1.00; 9.94], <i>P</i> = 0.05   | 15 [9; 18] (n=4)               | 1.16 [0.59; 2.27], <i>P</i> = 0.67    |
| <0.3 ml/kg/h for ≥24 h                                                   | 0 [0; 0] (n=9)                  |      | 7 (78)   | 2.77 [0.55; 13.87], <i>P</i> = 0.21  | 24 [22; 25] (n=2)              | 0.64 [0.26; 1.57], <i>P</i> = 0.32    |
| Need for renal re-<br>placement therapy                                  |                                 | 0.72 |          |                                      |                                |                                       |
| No                                                                       | 0 [0; 13] (n=184)               |      | 112 (61) | reference                            | 17 [8; 21] (n=72)              | reference                             |
| Yes                                                                      | 0 [0; 10] (n=8)                 |      | 5 (63)   | 1.06 [0.24; 4.62], <i>P</i> = 0.94   | 13 [7; 13] (n=3)               | 1.38 [0.63; 3.00], <i>P</i> = 0.43    |
| Diabetes insipidus                                                       |                                 |      |          |                                      |                                |                                       |
| No                                                                       | 0 [0; 0] (n=136)                | 0.09 | 75 (55)  | reference                            | 17 [7; 21] (n=61)              | reference                             |
| Suspected                                                                | 0 [0; 0] (n=4)                  |      | 4 (100)  | NR                                   | (n=0)                          | NR                                    |
| Confirmed                                                                | 0 [0; 0] (n=3)                  |      | 3 (100)  | NR                                   | (n=0)                          | NR                                    |
| Under intravenous<br>sedation with                                       |                                 |      |          |                                      |                                |                                       |
| Propofol                                                                 | 0 [0; 15] (n=114)               | 0.87 | 68 (60)  | reference                            | 18 [8; 21] (n=46)              | reference                             |
| Midazolam                                                                | 0 [0; 10] (n=36)                |      | 21 (58)  | 0.94 [0.44; 2.01], <i>P</i> = 0.87   | 13 [5; 16] (n=15)              | 1.40 [0.94; 2.10], <i>P</i> = 0.09    |
| Other                                                                    | 1 [0; 2] (n=2)                  |      | 1 (50)   | 0.21 [0.00; 343.78], <i>P</i> = 0.68 | 2 [2; 2] (n=1)                 | 11.92 [1.17; 120.90], <i>P</i> = 0.04 |
| Receiving a second<br>sedative agent                                     |                                 | 0.78 |          |                                      |                                |                                       |
| No                                                                       | 0 [0; 16] (n=67)                |      | 41 (61)  | reference                            | 18 [12; 24] (n=26)             | reference                             |
| Yes                                                                      | 0 [0; 12] (n=124)               |      | 74 (52)  | 0.93 [0.51; 1.72], <i>P</i> = 0.83   | 14 [6; 20] (n=50)              | 1.23 [0.91; 1.67], <i>P</i> = 0.17    |
| Highest Richmond<br>Agitation Sedation<br>Scale observed                 | <i>Rho</i> = -0.0804<br>(n=183) | 0.28 | 112 (61) | 1.12 [0.92; 1.36], <i>P</i> = 0.27   | <i>Rho</i> = 0.0838<br>(n=71)  | 0.99 [0.89; 1.09], <i>P</i> = 0.82    |
| Lowest Richmond<br>Agitation Sedation<br>Scale observed                  | <i>Rho</i> = -0.0667<br>(n=182) | 0.28 | 112 (62) | 1.11 [0.90; 1.38], <i>P</i> = 0.32   | <i>Rho</i> = 0.0780<br>(n=70)  | 1.03 [0.91; 1.16], <i>P</i> = 0.67    |
| Highest Behavioral<br>Pain Scale observed                                | <i>Rho</i> = 0.0597<br>(n=105)  | 0.54 | 63 (60)  | 1.08 [0.74; 1.61], <i>P</i> = 0.67   | <i>Rho</i> = -0.0287<br>(n=42) | 0.95 [0.75; 1.21], <i>P</i> = 0.70    |
| Lowest Behavioral<br>Pain Scale observed                                 | <i>Rho</i> = -0.0317<br>(n=105) | 0.75 | 63 (60)  | 0.98 [0.15; 6.23], <i>P</i> = 0.99   | <i>Rho</i> = -0.1755<br>(n=42) | 1.77 [0.71; 4.44], <i>P</i> = 0.22    |
| Bispectral index avail-<br>able                                          |                                 |      |          |                                      |                                |                                       |
| No                                                                       | 0 [0; 12] (n=157)               | 0.05 | 96 (61)  | reference                            | 15 [6; 20] (n=61)              | reference                             |
| Yes                                                                      | 11 [0; 18] (n=25)               |      | 11 (44)  | 0.50 [0.21; 1.18], <i>P</i> = 0.11   | 18 [14; 22] (n=14)             | 0.81 [0.56; 1.18], <i>P</i> = 0.27    |
| Highest bispectral in-<br>dex value                                      | <i>Rho</i> = 0.2195<br>(n=25)   | 0.29 | 11 (44)  | 0.95 [0.87; 1.04], <i>P</i> = 0.31   | <i>Rho</i> = 0.1062<br>(n=14)  | 0.99 [0.97; 1.02], <i>P</i> = 0.62    |
| Lowest bispectral in-<br>dex value                                       | <i>Rho</i> = 0.0280<br>(n=25)   | 0.89 | 11 (44)  | 0.92 [0.77; 1.11], <i>P</i> = 0.39   | <i>Rho</i> = -0.1631<br>(n=14) | 1.05 [1.01; 1.09], <i>P</i> = 0.01    |
| Richmond Agitation<br>Sedation Scale docu-<br>mented by bedside<br>nurse |                                 | 0.78 |          |                                      |                                |                                       |
| No                                                                       | 0 [0; 10] (n=28)                |      | 15 (54)  | reference                            | 11 [2; 14] (n=13)              | reference                             |
| Yes                                                                      | 0 [0; 16] (n=152)               |      | 89 (59)  | 1.24 [0.55; 2.80], <i>P</i> = 0.60   | 18 [8; 21] (n=63)              | 0.65 [0.44; 0.96], <i>P</i> = 0.03    |
| Pain assessment docu-<br>mented by bedside<br>nurse                      |                                 | 0.31 |          |                                      |                                |                                       |
| No                                                                       | 0 [0; 13] (n=81)                |      | 43 (53)  | reference                            | 14 [6; 20] (n=38)              | reference                             |
| Yes                                                                      | 0 [0; 11] (n=100)               |      | 63 (63)  | 1.51 [0.83; 2.75], <i>P</i> = 0.18   | 17 [8; 21] (n=37)              | 0.90 [0.67; 1.21], <i>P</i> = 0.49    |
| CAM-ICU assessment<br>documented by bed-<br>side nurse                   |                                 | 0.40 |          |                                      |                                |                                       |

|                                                             |                         |      |          |                                |                        |                                |
|-------------------------------------------------------------|-------------------------|------|----------|--------------------------------|------------------------|--------------------------------|
| No                                                          | 0 [0; 12] (n=133)       |      | 78 (59)  | reference                      | 14 [5; 20] (n=55)      | reference                      |
| Yes                                                         | 0 [0; 18] (n=33)        |      | 19 (58)  | 0.96 [0.44; 2.09], $P = 0.05$  | 20 [16; 24] (n=14)     | 0.69 [0.48; 1.00], $P = 0.92$  |
| Spontaneous awakening trial performed                       |                         |      |          |                                |                        |                                |
| No                                                          | 0 [0; 14] (n=178)       | 0.25 | 103 (58) | reference                      | 16 [8; 21] (n=75)      | reference                      |
| Yes                                                         | 11 [0; 0] (n=2)         |      | 2 (100)  | NR                             | (n=0)                  | NR                             |
| Ventilation mode                                            |                         |      |          |                                |                        |                                |
| Volume-controlled                                           | 0 [0; 13] (n=85)        |      | 51 (60)  | reference                      | 16 [8; 22] (n=34)      | reference                      |
| Pressure-controlled                                         | 0 [0; 13] (n=55)        | 0.09 | 32 (58)  | 0.93 [0.46; 1.85], $P = 0.83$  | 15 [8; 20] (n=23)      | 1.07 [0.76; 1.52], $P = 0.68$  |
| Pressure-support                                            | 0 [0; 0] (n=14)         |      | 13 (93)  | 8.67 [1.09; 69.90], $P = 0.04$ | 27 [27; 27] (n=1)      | 0.55 [0.16; 1.91], $P = 0.35$  |
| Other                                                       | 1 [0; 18] (n=36)        |      | 18 (50)  | 0.6 [0.30; 1.46], $P = 0.31$   | 18 [5; 20] (n=18)      | 1.00 [0.69; 1.45], $P = 0.98$  |
| Tidal volume, mL/kg PBW                                     | $Rho = -0.1220$ (n=187) | 0.10 | 112 (60) | 1.23 [0.98; 1.57], $P = 0.08$  | $Rho = -0.0295$ (n=75) | 1.02 [0.91; 1.14], $P = 0.80$  |
| Dynamic inspiratory plateau pressure, cmH <sub>2</sub> O    | $Rho = -0.1472$ (n=122) | 0.11 | 74 (61)  | 1.03 [0.96; 1.11], $P = 0.40$  | $Rho = -0.3307$ (n=48) | 1.05 [0.99; 1.10], $P = 0.07$  |
| Compliance of the respiratory system, mL/cmH <sub>2</sub> O | $Rho = 0.0531$ (n=122)  | 0.56 | 74 (61)  | 1.01 [0.99; 1.03], $P = 0.50$  | $Rho = 0.4156$ (n=48)  | 0.98 [0.97; 0.99], $P = 0.03$  |
| Airway resistance, cmH <sub>2</sub> O/L/s                   | $Rho = 0.1681$ (n=67)   | 0.17 | 41 (61)  | 0.96 [0.92; 0.99], $P = 0.04$  | $Rho = 0.2104$ (n=26)  | 0.99 [0.98; 1.01], $P = 0.33$  |
| Driving pressure, cmH <sub>2</sub> O                        | $Rho = -0.1427$ (n=122) | 0.12 | 74 (61)  | 1.02 [0.95; 1.11], $P = 0.55$  | $Rho = -0.3787$ (n=48) | 1.07 [1.02; 1.12], $P = 0.005$ |
| Receiving adjunctive therapies for ARDS                     |                         |      |          |                                |                        |                                |
| No                                                          | 0 [0; 15] (n=74)        | 0.36 | 42 (58)  | reference                      | 18 [7; 20] (n=32)      | reference                      |
| Yes                                                         | 0 [0; 12] (n=116)       |      | 73 (63)  | 1.30 [0.71; 2.34], $P = 0.40$  | 16 [8; 21] (n=43)      | 1.03 [0.77; 1.39], $P = 0.83$  |
| Receiving neuromuscular blockade                            |                         |      |          |                                |                        |                                |
| No                                                          | 0 [0; 5] (n=51)         | 0.12 | 36 (71)  | reference                      | 16 [5; 20] (n=15)      | reference                      |
| Yes                                                         | 0 [0; 13] (n=63)        |      | 36 (57)  | 0.56 [0.25; 1.22], $P = 0.14$  | 16 [11; 22] (n=27)     | 0.90 [0.60; 1.35], $P = 0.62$  |
| Receiving inhaled nitric oxide                              |                         |      |          |                                |                        |                                |
| No                                                          | 0 [0; 12] (n=109)       | 0.09 | 66 (61)  | reference                      | 16 [8; 21] (n=43)      | reference                      |
| Yes                                                         | 0 [0; 0] (n=5)          |      | 5 (100)  | NR                             | (n=0)                  | NR                             |
| Receiving prone position                                    |                         |      |          |                                |                        |                                |
| No                                                          | 0 [0; 10] (n=52)        | 0.66 | 34 (65)  | reference                      | 17 [8; 21] (n=18)      | reference                      |
| Yes                                                         | 0 [0; 12] (n=62)        |      | 37 (60)  | 0.78 [0.36; 1.68], $P = 0.53$  | 13 [8; 20] (n=25)      | 1.11 [0.74; 1.64], $P = 0.62$  |
| Receiving recruitment maneuver(s)                           |                         |      |          |                                |                        |                                |
| No                                                          | 0 [0; 5] (n=78)         | 0.09 | 51 (65)  | reference                      | 12 [5; 19] (n=27)      | reference                      |
| Yes                                                         | 0 [0; 18] (n=36)        |      | 20 (56)  | 0.67 [0.30; 1.49], $P = 0.32$  | 19 [15; 23] (n=16)     | 0.64 [0.44; 0.93], $P = 0.02$  |
| Receiving extracorporeal membrane oxygenation               |                         |      |          |                                |                        |                                |
| No                                                          | 0 [0; 13] (n=103)       | 0.02 | 61 (59)  | reference                      | 16 [8; 21] (n=42)      | reference                      |
| Yes                                                         | 0 [0; 0] (n=9)          |      | 9 (100)  | NR                             | (n=0)                  | NR                             |
| Receiving corticosteroid therapy                            |                         |      |          |                                |                        |                                |
| No                                                          | 0 [0; 11] (n=85)        | 0.86 | 50 (59)  | reference                      | 13 [5; 20] (n=35)      | reference                      |

|                                           |                              |         |                                    |                                     |                                    |
|-------------------------------------------|------------------------------|---------|------------------------------------|-------------------------------------|------------------------------------|
| Yes                                       | 0 [0; 15] (n=107)            | 66 (62) | 1.13 [0.63; 2.03], <i>P</i> = 0.67 | 18 [12; 22] (n=41)                  | 0.77 [0.58; 1.03], <i>P</i> = 0.08 |
| Receiving antibiotic therapy              |                              |         |                                    |                                     |                                    |
| No                                        | 0 [0; 12] (n=33)             | 0.46    | 18 (55)                            | reference                           | 15 [5; 20] (n=15)                  |
| Yes                                       | 0 [0; 13] (n=159)            |         | 99 (62)                            | 1.38 [0.64; 2.94], <i>P</i> = 0.41  | 17 [8; 21] (n=60)                  |
|                                           |                              |         |                                    |                                     | 0.94 [0.65; 1.36], <i>P</i> = 0.75 |
| Arterial pH                               | <i>Rho</i> = 0.1164 (n=189)  | 0.11    | 114 (60)                           | 0.04 [0.01; 1.57], <i>P</i> = 0.09  | <i>Rho</i> = 0.1707 (n=75)         |
|                                           |                              |         |                                    |                                     | 0.29 [0.05; 1.78], <i>P</i> = 0.18 |
| PaO <sub>2</sub> /FiO <sub>2</sub> , mmHg | <i>Rho</i> = 0.2278 (n=181)  | 0.002   | 109 (60)                           | 0.99 [0.99; 0.99], <i>P</i> = 0.03  | <i>Rho</i> = 0.3304 (n=72)         |
|                                           |                              |         |                                    |                                     | 0.99 [0.99; 0.99], <i>P</i> = 0.01 |
| PaCO <sub>2</sub> , mmHg                  | <i>Rho</i> = -0.1303 (n=189) | 0.07    | 114 (60)                           | 1.01 [0.99; 1.04], <i>P</i> = 0.33  | <i>Rho</i> = -0.3216 (n=75)        |
|                                           |                              |         |                                    |                                     | 1.02 [1.01; 1.04], <i>P</i> = 0.01 |
| Serum lactate, mmol/L                     | <i>Rho</i> = -0.1338 (n=165) | 0.09    | 114 (69)                           | 1.43 [0.88; 2.32], <i>P</i> = 0.15  | <i>Rho</i> = 0.0196 (n=65)         |
|                                           |                              |         |                                    |                                     | 1.06 [0.79; 1.43], <i>P</i> = 0.68 |
| Serum creatinine, μmol/L                  | <i>Rho</i> = -0.2264 (n=174) | 0.002   | 106 (61)                           | 1.01 [1.00; 1.02], <i>P</i> = 0.004 | <i>Rho</i> = -0.0931 (n=68)        |
|                                           |                              |         |                                    |                                     | 1.00 [1.00; 1.00], <i>P</i> = 0.74 |

\* *P* values were calculated for comparisons between patients receiving inhaled sedation (for at least 24 hours) and those receiving only intravenous sedation through day 28. VFD28: ventilator-free days through day 28; OR: odds ratio; IRR: incident rate ratio; CI: confidence interval; ACE: angiotensin-converting enzyme; PaO<sub>2</sub>: partial pressure of oxygen in arterial blood; FiO<sub>2</sub>: fraction of inspired oxygen; PaCO<sub>2</sub>: partial pressure of carbon dioxide in arterial blood; CAM-ICU: confusion assessment method in the intensive care unit; PWB: predicted body weight; ARDS: acute respiratory distress syndrome.

**Table S4.** Baseline variables integrated in the propensity score that was used to predict probability of receiving inhaled sedation or not, and derived from the fitted regression model (logistic regression).

|                                                               | Coefficient | Standard Error | <i>z</i> | <i>P</i> >   <i>z</i> | 95% Confidence Interval |
|---------------------------------------------------------------|-------------|----------------|----------|-----------------------|-------------------------|
| Richmond Agitation Sedation Scale documented by bedside nurse | 0.30        | 0.47           | 0.64     | 0.53                  | [-0.63; 1.23]           |
| CAM-ICU assessment documented by bedside nurse                | 1.86        | 0.62           | 2.99     | 0.003                 | [0.64; 3.07]            |
| Receiving a second sedative agent                             | -0.39       | 0.41           | -0.95    | 0.34                  | [-1.18; 0.41]           |
| Tidal volume (mL/kg PBW)                                      | 0.16        | 0.13           | 1.27     | 0.21                  | [-0.09; 0.41]           |
| Receiving COVID-19 “specific” therapy                         | -0.29       | 0.36           | -0.80    | 0.43                  | [-1.00; 0.42]           |

CAM-ICU: confusion assessment method in the intensive care unit; PBW: predicted body weight; COVID-19: coronavirus disease 2019.

**Table S5.** Selected baseline characteristics (demographics, medical history, clinical and biological data) according to treatment assignment (inhaled versus intravenous sedation) in propensity-matched patients.

| Variable                                         | No. of Available Individuals | Inhaled Sedation Group (n = 43) | IV Sedation Group (n = 29) | <i>P</i> Value* |
|--------------------------------------------------|------------------------------|---------------------------------|----------------------------|-----------------|
| <b>Demographics</b>                              |                              |                                 |                            |                 |
| Age, mean ± SD                                   | 72                           | 68 ± 11                         | 67 ± 9                     | 0.95            |
| Men, No. (%)                                     | 70                           | 31 (74)                         | 24 (86)                    | 0.23            |
| Body mass index, median (IQR), kg/m <sup>2</sup> | 72                           | 30 [28; 34]                     | 27 [26; 31]                | 0.05            |
| <b>Comorbidities, No. (%)</b>                    |                              |                                 |                            |                 |
| Cigarette smoking status                         | 72                           |                                 |                            | 0.75            |
| Current smoker                                   |                              | 6 (14)                          | 3 (10)                     |                 |
| Past-smoker                                      |                              | 6 (14)                          | 5 (17)                     |                 |
| Never smoked                                     |                              | 21 (50)                         | 12 (41)                    |                 |
| Unknown                                          |                              | 9 (21)                          | 9 (31)                     |                 |

|                                                              |    |                   |                   |                  |
|--------------------------------------------------------------|----|-------------------|-------------------|------------------|
| Daily alcohol intake                                         | 71 |                   |                   | 0.40             |
| <i>No</i>                                                    |    | 29 (69)           | 19 (66)           |                  |
| <i>Yes</i>                                                   |    | 2 (5)             | 0 (0)             |                  |
| <i>Unknown</i>                                               |    | 11 (26)           | 10 (34)           |                  |
| Myocardial infarction                                        | 72 | 2 (5)             | 3 (10)            | 0.35             |
| Chronic heart failure                                        | 72 | 6 (14)            | 4 (14)            | 0.99             |
| Hypertension                                                 | 72 | 33 (77)           | 21 (72)           | 0.68             |
| COPD                                                         | 72 | 4 (9)             | 3 (10)            | 0.88             |
| Asthma                                                       | 71 | 3 (7)             | 1 (4)             | 0.54             |
| Chronic liver disease                                        | 62 | 2 (6)             | 1 (4)             | 0.70             |
| Moderate to severe chronic kidney disease                    | 72 | 3 (7)             | 4 (14)            | 0.34             |
| Diabetes mellitus                                            | 60 |                   |                   | 0.18             |
| <i>Uncomplicated</i>                                         |    | 9 (27)            | 4 (15)            |                  |
| <i>End-organ damage</i>                                      |    | 0 (0)             | 2 (8)             |                  |
| Type 2 diabetes                                              | 70 | 17 (40)           | 11 (39)           | 0.92             |
| Solid tumor                                                  | 66 |                   |                   | 0.51             |
| <i>Localized</i>                                             |    | 4 (10)            | 4 (15)            |                  |
| <i>Metastatic</i>                                            |    | 0 (0)             | 0 (0)             |                  |
| Mc Cabe score                                                | 49 |                   |                   | 0.36             |
| <i>Non fatal disease</i>                                     |    | 27 (90)           | 19 (100)          |                  |
| <i>Ultimately fatal disease</i>                              |    | 2 (7)             | 0 (0)             |                  |
| <i>Rapidly fatal disease</i>                                 |    | 1 (3)             | 0 (0)             |                  |
| <b>Long-term medication, No (%)</b>                          |    |                   |                   |                  |
| Corticosteroids                                              | 72 | 5 (12)            | 2 (7)             | 0.73             |
| Immuno-modulatory/-suppressant in the last 3 months          | 71 | 4 (9)             | 2 (7)             | 0.94             |
| <b>Clinical data</b>                                         |    |                   |                   |                  |
| Temperature (°c)                                             | 72 | 37.1 [36.6; 37.8] | 37.2 [36.7; 37.8] | 0.85             |
| Heart rate (/min)                                            | 72 | 79 [65; 100]      | 77 [70; 99]       | 0.87             |
| Mean blood pressure (mmHg)                                   | 72 | 72 [65; 86]       | 77 [71; 91]       | 0.10             |
| Supraventricular tachycardia                                 | 72 | 1 (2)             | 2 (7)             | 0.34             |
| Atrial fibrillation                                          | 70 | 2 (5)             | 0 (0)             | 0.24             |
| <b>Mechanical ventilation data</b>                           |    |                   |                   |                  |
| Ventilation mode                                             | 72 |                   |                   | 0.002            |
| <i>Volume-controlled ventilation</i>                         |    | 26 (60)           | 9 (31)            |                  |
| <i>Pressure-controlled ventilation</i>                       |    | 15 (35)           | 9 (31)            |                  |
| <i>Pressure-support ventilation</i>                          |    | 2 (5)             | 5 (17)            |                  |
| <i>Other</i>                                                 |    | 0 (0)             | 6 (21)            |                  |
| Dynamic plateau pressure (cmH <sub>2</sub> O)                | 47 | 25 [22; 27]       | 26 [23; 30]       | 0.30             |
| PEEP (cmH <sub>2</sub> O)                                    | 72 | 12 [10; 14]       | 12 [10; 13]       | 0.08             |
| Expired tidal volume (mL)                                    | 72 | 440 [375; 480]    | 451 [419; 507]    | 0.23             |
| Tidal volume (mL/kg PBW)                                     | 72 | 6.7 [5.9; 7.8]    | 7.0 [6.2; 7.5]    | 0.81             |
| Compliance of the respiratory system (mL/cmH <sub>2</sub> O) | 47 | 39 [30; 50]       | 34 [27; 39]       | 0.09             |
| Driving pressure (cmH <sub>2</sub> O)                        | 47 | 11 [9; 13]        | 14 [12; 17]       | 0.04             |
| <b>Sedation</b>                                              |    |                   |                   |                  |
| Receiving sedation                                           | 72 | 43 (100)          | 29 (100)          | -                |
| If intravenous sedation                                      | 72 | 23 (53)           | 28 (97)           | 10 <sup>-4</sup> |
| <i>Sedation with propofol</i>                                |    | 16 (70)           | 21 (75)           |                  |
| <i>Sedation with midazolam</i>                               |    | 7 (30)            | 7 (25)            |                  |
| If inhaled sedation                                          | 72 | 20 (47)           | 0 (0)             | 10 <sup>-4</sup> |
| <i>Sedation with Sevoflurane</i>                             |    | 13 (65)           | 0 (0)             |                  |
| <i>Sedation with Isoflurane</i>                              |    | 7 (35)            | 0 (0)             |                  |
| <i>Use of Sedaconda-ACD-S</i>                                |    | 20 (100)          | 0 (0)             |                  |
| Use of a second sedative agent                               | 72 | 17 (40)           | 19 (66)           | 0.03             |
| <b>Treatments</b>                                            |    |                   |                   |                  |
| Receiving vasopressors, n (%)                                | 71 | 30 (71)           | 23 (79)           | 0.45             |
| Renal replacement therapy                                    | 72 | 2 (5)             | 1 (3)             | 0.80             |
| Receiving antibiotics                                        | 71 | 33 (79)           | 25 (86)           | 0.41             |
| Tocilizumab                                                  | 72 | 1 (11)            | 0 (0)             | 0.75             |
| Steroid therapy                                              | 71 | 29 (69)           | 15 (51)           | 0.14             |
| <b>Biological data</b>                                       |    |                   |                   |                  |

|                                           |    |                   |                   |      |
|-------------------------------------------|----|-------------------|-------------------|------|
| PaO <sub>2</sub> /FiO <sub>2</sub> (mmHg) | 71 | 121 [91; 155]     | 128 [85; 174]     | 0.56 |
| PaCO <sub>2</sub> (mmHg)                  | 72 | 46 [41; 53]       | 44 [36; 50]       | 0.20 |
| Serum lactate (mmol/L)                    | 61 | 1.3 [1.1; 1.7]    | 1.3 [1.1; 1.5]    | 0.93 |
| pH                                        | 72 | 7.36 [7.29; 7.40] | 7.37 [7.32; 7.43] | 0.30 |
| Serum creatinine (μmol/L)                 | 65 | 86 [70; 114]      | 81 [59; 107]      | 0.40 |

\* *P* values were calculated for comparisons between patients receiving inhaled sedation (for at least 24 hours) and those receiving only intravenous sedation through day 28. Percentages are expressed out of available individuals for each variable, and may not sum to 100% due to rounding. Quantitative variables are expressed as median [IQR], qualitative variables as number (%), unless specified otherwise. SD: standard deviation; IQR: interquartile range; COPD: chronic obstructive pulmonary disease; ARDS: acute respiratory distress syndrome; PEEP: positive end expiratory pressure; PBW: predicted body weight; ECMO: extracorporeal membrane oxygenation; PaO<sub>2</sub>: partial pressure of oxygen in arterial blood; PaCO<sub>2</sub>: partial pressure of carbon dioxide in arterial blood.

**Table S6.** Primary and secondary endpoints according to treatment assignment (inhaled versus intravenous sedation) in propensity-matched patients.

| Variable                                               | No. of available individuals | Inhaled Sedation Group (n = 43) | Intravenous Sedation Group (n = 29) | P value*                | Relative risk or regression coefficient (95% CI)  |
|--------------------------------------------------------|------------------------------|---------------------------------|-------------------------------------|-------------------------|---------------------------------------------------|
| <b>Primary endpoint</b>                                |                              |                                 |                                     |                         |                                                   |
| VFD28 <sup>§</sup>                                     | 72                           | 0 [0; 12]                       | 8 [0; 17]                           | 0.06 (OR)<br>0.78 (IRR) | 2.56 [0.96; 6.69] (OR)<br>1.05 [0.73; 1.52] (IRR) |
| <b>Clinical safety endpoints</b>                       |                              |                                 |                                     |                         |                                                   |
| Death at day 28, n (%)                                 | 71                           | 17 (41)                         | 10 (36)                             | 0.27                    | 0.84 [0.61; 1.15]                                 |
| ICU-free days through day 28                           | 72                           | 0 [0; 0]                        | 2 [0; 12]                           | 0.01                    | -0.80 [-1.36; -0.23]                              |
| Hospital-free days through day 28                      | 70                           | 0 [0; 0]                        | 0 [0; 6]                            | 0.01                    | -0.58 [-0.99; -0.17]                              |
| <b>Ventilation (total duration in days)</b>            |                              |                                 |                                     |                         |                                                   |
| Duration of invasive mechanical ventilation            | 70                           | 15 [6; 25]                      | 12 [8; 21]                          | 0.74                    | -0.07 [-0.47; -0.34]                              |
| Duration of controlled mechanical ventilation          | 70                           | 13 [5; 23]                      | 8 [4; 14]                           | 0.11                    | 0.33 [-0.07; 0.74]                                |
| <b>Norepinephrine support (total duration in days)</b> | 71                           | 9 [4; 20]                       | 8 [3; 15]                           | 0.48                    | 0.15 [-0.28; 0.58]                                |
| <b>Kidney</b>                                          |                              |                                 |                                     |                         |                                                   |
| Use of RRT, n (%)                                      |                              | 17 (40)                         | 9 (31)                              | 0.43                    | 1.30 [0.68; 2.51]                                 |
| Total duration of RRT (days)                           | 71                           | 12 [3; 20]                      | 10 [7; 22]                          | 0.29                    | -0.36 [-1.05; 0.32]                               |
| Nephrogenic diabetes insipidus                         | 26                           |                                 |                                     |                         |                                                   |
| Suspected                                              | 58                           | 1 (2)                           | 2 (7)                               | 0.37                    | 0.34 [0.03; 3.55]                                 |
| Confirmed                                              |                              | 1 (2)                           | 1 (3)                               | 0.80                    | 1.35 [0.13; 14.20]                                |
| <b>Sedation and NMB (total duration in days)</b>       |                              |                                 |                                     |                         |                                                   |
| Inhaled sedation                                       | 71                           | 7 [3; 11]                       | 0 [0; 0]                            | <10 <sup>-3</sup>       | 1.96 [1.67; 2.25]                                 |
| Intravenous sedation                                   | 72                           | 7 [2; 16]                       | 10 [8; 15]                          | 0.02                    | -0.50 [-0.92; -0.08]                              |
| Cisatracurium administration                           | 71                           | 1 [0; 3]                        | 0 [0; 4]                            | 0.99                    | 0.00 [-0.43; 0.43]                                |

Durations are expressed in days since day 0 (study entry). Quantitative variables are expressed as median [interquartile range] and qualitative variables as number (%), unless specified otherwise. \**P* values were calculated for comparisons between patients receiving inhaled sedation (for at least 24 hours) and those receiving only intravenous sedation through day 28. Effect sizes are expressed as relative risks for categorical variables and regression coefficients for quantitative variables (as expressed for each one-log change in value), with 95% confidence intervals (CI). <sup>§</sup> Zero-inflated negative binomial regression was performed for analysis of the primary endpoint (ventilator-free days through day 28) and results were expressed, with 95% confidence intervals (CI), as the odds ratio (OR) for having zero ventilator-free days through day 28 and the incident rate ratio (IRR) for the number of ventilator-free days when not zero. CI: confidence interval; OR: odds ratio; IRR: incident rate ratio; VFD28: ventilator-free days through day 28; ICU: intensive care unit; RRT: renal replacement therapy; NMB: neuromuscular blockade.

**Table S7.** Sensitivity analysis of the primary endpoint (ventilator-free days through day 28) when defining groups based on the length of inhaled sedation received ( $\geq 2$ ,  $\geq 3$ ,  $\geq 4$ ,  $\geq 5$ ,  $\geq 7$  or  $\geq 10$  days).

| Variable                | Univariate analysis<br>(Zero-inflated negative binomial regression) |                                         |                                      |                                                                             |                                                       |
|-------------------------|---------------------------------------------------------------------|-----------------------------------------|--------------------------------------|-----------------------------------------------------------------------------|-------------------------------------------------------|
|                         | VFD28,<br>median [IQR]                                              | Patients with<br>zero VFD28,<br>no. (%) | OR [95%CI]<br>for having zero VFD28  | VFD28<br>if VFD28 not zero,<br>median [IQR] or cor-<br>relation coefficient | IRR [95%CI] for the<br>number of VFD28<br>if not zero |
| <b>Type of Sedation</b> |                                                                     |                                         |                                      |                                                                             |                                                       |
| Intravenous             | 0 [0; 17] (n=96)                                                    | 53 (55)                                 | <i>reference</i>                     | 18 [8; 22] (n=43)                                                           | <i>reference</i>                                      |
| Inhaled $\geq 2$ days   | 0 [0; 8] (n=97)                                                     | 64 (66)                                 | 1.57 [0.88; 2.82]<br><i>P</i> = 0.13 | 13 [8; 20] (n=33)                                                           | 1.14 [0.85; 1.54]<br><i>P</i> = 0.39                  |
| <b>Type of Sedation</b> |                                                                     |                                         |                                      |                                                                             |                                                       |
| Intravenous             | 0 [0; 17] (n=111)                                                   | 62 (56)                                 | <i>reference</i>                     | 18 [8; 22] (n=49)                                                           | <i>reference</i>                                      |
| Inhaled $\geq 3$ days   | 0 [0; 8] (n=82)                                                     | 55 (67)                                 | 1.61 [0.89; 2.92]<br><i>P</i> = 0.12 | 13 [8; 19] (n=27)                                                           | 1.17 [0.87; 1.60]<br><i>P</i> = 0.30                  |
| <b>Type of Sedation</b> |                                                                     |                                         |                                      |                                                                             |                                                       |
| Intravenous             | 0 [0; 17] (n=122)                                                   | 66 (54)                                 | <i>reference</i>                     | 18 [8; 22] (n=56)                                                           | <i>reference</i>                                      |
| Inhaled $\geq 4$ days   | 0 [0; 5] (n=71)                                                     | 51 (72)                                 | 2.15 [1.15; 4.04]<br><i>P</i> = 0.02 | 12 [7; 16] (n=20)                                                           | 1.36 [0.98; 1.90]<br><i>P</i> = 0.07                  |
| <b>Type of Sedation</b> |                                                                     |                                         |                                      |                                                                             |                                                       |
| Intravenous             | 0 [0; 17] (n=134)                                                   | 73 (54)                                 | <i>reference</i>                     | 18 [8; 22] (n=61)                                                           | <i>reference</i>                                      |
| Inhaled $\geq 5$ days   | 0 [0; 2] (n=59)                                                     | 44 (75)                                 | 2.44 [1.23; 4.81]<br><i>P</i> = 0.01 | 12 [6; 15] (n=15)                                                           | 1.43 [0.99; 2.08]<br><i>P</i> = 0.06                  |
| <b>Type of Sedation</b> |                                                                     |                                         |                                      |                                                                             |                                                       |
| Intravenous             | 0 [0; 16] (n=145)                                                   | 81 (56)                                 | <i>reference</i>                     | 18 [8; 22] (n=64)                                                           | <i>reference</i>                                      |
| Inhaled $\geq 7$ days   | 0 [0; 1] (n=48)                                                     | 36 (75)                                 | 2.36 [1.13; 4.90]<br><i>P</i> = 0.02 | 13 [6; 16] (n=12)                                                           | 1.40 [0.94; 2.12]<br><i>P</i> = 0.10                  |
| <b>Type of Sedation</b> |                                                                     |                                         |                                      |                                                                             |                                                       |
| Intravenous             | 0 [0; 14] (n=162)                                                   | 94 (58)                                 | <i>reference</i>                     | 17 [8; 22] (n=68)                                                           | <i>reference</i>                                      |
| Inhaled $\geq 10$ days  | 0 [0; 5] (n=31)                                                     | 23 (74)                                 | 2.08 [0.87; 4.90]<br><i>P</i> = 0.10 | 13 [7; 16] (n=8)                                                            | 1.31 [0.81; 2.14]<br><i>P</i> = 0.27                  |

VFD28: ventilator-free days through day 28; OR: odds ratio; CI: confidence interval; IQR: interquartile range; IRR: incident rate ratio.

**Table S8.** Subgroup unadjusted analysis of the primary endpoint (ventilator-free days through day 28).

|                                                                                        | OR [95%CI]<br>for having zero VFD28,<br><i>P</i> value | P<br>for treatment<br>× subgroup in-<br>teraction | IRR [95%CI]<br>for the number of VFD28 if not zero,<br><i>P</i> value | P<br>for treatment<br>× subgroup in-<br>teraction |
|----------------------------------------------------------------------------------------|--------------------------------------------------------|---------------------------------------------------|-----------------------------------------------------------------------|---------------------------------------------------|
| Presence of mild ARDS (PaO <sub>2</sub> /FiO <sub>2</sub> of 200-299 mmHg) at baseline |                                                        |                                                   |                                                                       |                                                   |
| No (n=176)                                                                             | 1.57 [0.84–2.92], <i>P</i> =0.15                       | 0.41                                              | 1.10 [0.79–1.52], <i>P</i> =0.57                                      | 0.73                                              |
| Yes (n=17)                                                                             | 2.41 [0.30–19.11], <i>P</i> =0.41                      |                                                   | 1.27[0.72–2.27], <i>P</i> =0.41                                       |                                                   |
| Presence of severe ARDS (PaO <sub>2</sub> /FiO <sub>2</sub> <100 mmHg) at baseline     |                                                        |                                                   |                                                                       |                                                   |
| No (n=147)                                                                             | 1.75 [0.90–3.39], <i>P</i> =0.10                       | 0.88                                              | 1.11 [0.84–1.48], <i>P</i> =0.48                                      | 0.38                                              |
| Yes (n=46)                                                                             | 0.92 [0.22–3.86], <i>P</i> =0.91                       |                                                   | 0.75 [0.24–2.29], <i>P</i> =0.61                                      |                                                   |
| Need for vasopressor support at baseline                                               |                                                        |                                                   |                                                                       |                                                   |
| No (n=40)                                                                              | 6.69 [0.72–12.00], <i>P</i> =0.13                      | 0.22                                              | 1.42 [0.88–2.29], <i>P</i> =0.15                                      | 0.26                                              |
| Yes (n=150)                                                                            | 1.54 [0.78–3.03], <i>P</i> =0.22                       |                                                   | 1.01 [0.70–1.45], <i>P</i> =0.97                                      |                                                   |
| Receiving isoflurane at baseline                                                       |                                                        |                                                   |                                                                       |                                                   |
| No (n=183)                                                                             | 1.60 [0.88–2.92], <i>P</i> =0.12                       | 0.17                                              | 1.19 [0.88–1.60], <i>P</i> =0.26                                      | 0.99                                              |

|                                                                                                                                                                                                                                                                                                                                                                                 |                                  |      |                                     |      |
|---------------------------------------------------------------------------------------------------------------------------------------------------------------------------------------------------------------------------------------------------------------------------------------------------------------------------------------------------------------------------------|----------------------------------|------|-------------------------------------|------|
| Yes (n=13)                                                                                                                                                                                                                                                                                                                                                                      | 2.03 [0.53–7.77], <i>P</i> =0.30 |      | 0.69 [0.33–1.43], <i>P</i> =0.32    |      |
| Receiving sevoflurane at baseline                                                                                                                                                                                                                                                                                                                                               |                                  |      |                                     |      |
| No (n=167)                                                                                                                                                                                                                                                                                                                                                                      | 1.72 [0.91–3.25], <i>P</i> =0.09 | 0.29 | 1.19 [0.84–1.6], <i>P</i> =0.32     | 0.86 |
| Yes (n=29)                                                                                                                                                                                                                                                                                                                                                                      | 1.07 [0.48–2.92], <i>P</i> =0.86 |      | 0.95 [0.63–1.45], <i>P</i> =0.82    |      |
| Intravenous sedative agent at baseline                                                                                                                                                                                                                                                                                                                                          |                                  |      |                                     |      |
| Propofol (n=116)                                                                                                                                                                                                                                                                                                                                                                | 1.73 [0.89–3.39], <i>P</i> =0.11 | 0.37 | 1.16 [0.81–1.68], <i>P</i> =0.41    | 0.49 |
| Midazolam (n=36)                                                                                                                                                                                                                                                                                                                                                                | 0.93 [0.43–2.01], <i>P</i> =0.86 |      | 1.35 [0.90–2.03], <i>P</i> =0.16    |      |
| Other (n=2)                                                                                                                                                                                                                                                                                                                                                                     | 0.16 [0.00–1.73], <i>P</i> =0.62 |      | 11.02 [1.04–109.95], <i>P</i> =0.05 |      |
| Receiving inhaled sedation for ≥5 days                                                                                                                                                                                                                                                                                                                                          |                                  |      |                                     |      |
| No (n=134)                                                                                                                                                                                                                                                                                                                                                                      | 1.04 [0.51–2.12], <i>P</i> =0.91 | 0.01 | 0.99 [0.70–1.40], <i>P</i> =0.97    | 0.09 |
| Yes (n=62)                                                                                                                                                                                                                                                                                                                                                                      | 2.44 [1.23–4.81], <i>P</i> =0.01 |      | 1.53 [0.99–2.08], <i>P</i> =0.06    |      |
| Receiving intravenous sedation for ≥11 days                                                                                                                                                                                                                                                                                                                                     |                                  |      |                                     |      |
| No (n=92)                                                                                                                                                                                                                                                                                                                                                                       | 2.29 [0.96–5.42], <i>P</i> =0.06 | 0.32 | 1.22 [0.96–1.55], <i>P</i> =0.10    | 0.81 |
| Yes (n=104)                                                                                                                                                                                                                                                                                                                                                                     | 1.55 [0.64–3.71], <i>P</i> =0.33 |      | 1.16 [0.63–2.14], <i>P</i> =0.64    |      |
| Patients admitted in an ICU-like unit                                                                                                                                                                                                                                                                                                                                           |                                  |      |                                     |      |
| No (n=189)                                                                                                                                                                                                                                                                                                                                                                      | 1.65 [0.91–3.00], <i>P</i> =0.10 | NA   | 1.13 [0.84–1.52], <i>P</i> =0.43    | NA   |
| Yes (n=4)                                                                                                                                                                                                                                                                                                                                                                       | NA                               |      | NA                                  |      |
| NA: Not applicable (VFD28 = 0 for all patients); VFD28: ventilator-free days through day 28; OR: odds ratio; CI: confidence interval; IQR: interquartile range; IRR: incident rate ratio; ARDS: acute respiratory distress syndrome; PaO <sub>2</sub> : partial pressure of oxygen in arterial blood; FiO <sub>2</sub> : fraction of inspired oxygen; ICU: intensive care unit. |                                  |      |                                     |      |

**Table S9.** Mechanical ventilation data and adjunctive ARDS therapies received during the first seven days after inclusion.

|                                                  |                                  |                                   | Day 1            | Day 2            | Day 3            | Day 4            | Day 5            | Day 6            | Day 7       |
|--------------------------------------------------|----------------------------------|-----------------------------------|------------------|------------------|------------------|------------------|------------------|------------------|-------------|
| No. of observations available                    |                                  |                                   | 193              | 189              | 185              | 184              | 179              | 172              | 165         |
| Ventilation mode                                 | Inhaled Se-<br>dation<br>Group   | Number of pa-<br>tients — no. (%) | 53 (48)          | 50 (46)          | 40 (37)          | 41 (39)          | 35 (34)          | 34 (34)          | 32 (33)     |
|                                                  |                                  |                                   | 23 (21)          | 20 (18)          | 19 (18)          | 17 (16)          | 18 (17)          | 14 (14)          | 16 (17)     |
|                                                  |                                  |                                   | 23 (21)          | 25 (23)          | 33 (31)          | 35 (33)          | 34 (33)          | 37 (37)          | 32 (33)     |
|                                                  |                                  |                                   | 0 (0)            | 0 (0)            | 2 (2)            | 0 (0)            | 1 (1)            | 0 (0)            | 0 (0)       |
|                                                  |                                  |                                   | 1 (1)            | 3 (3)            | 2 (2)            | 2 (3)            | 3 (3)            | 3 (3)            | 3 (3)       |
|                                                  |                                  |                                   | 0 (0)            | 0 (0)            | 2 (2)            | 1 (1)            | 3 (3)            | 2 (2)            | 2 (2)       |
|                                                  |                                  |                                   | 10 (9)           | 11 (10)          | 10 (9)           | 25 (32)          | 9 (9)            | 10 (10)          | 10 (10)     |
|                                                  |                                  |                                   | 0 (0)            | 0 (0)            | 0 (0)            | 0 (0)            | 0 (0)            | 0 (0)            | 1 (1)       |
|                                                  |                                  |                                   | 25 (30)          | 22 (28)          | 21 (27)          | 17 (22)          | 17 (22)          | 14 (19)          | 15 (22)     |
|                                                  |                                  |                                   | 13 (16)          | 9 (11)           | 9 (12)           | 8 (10)           | 7 (9)            | 4 (6)            | 4 (6)       |
|                                                  | Intravenous<br>Sedation<br>Group | Number of pa-<br>tients — no. (%) | 13 (16)          | 15 (19)          | 14 (18)          | 22 (28)          | 20 (26)          | 22 (31)          | 18 (26)     |
|                                                  |                                  |                                   | 0 (0)            | 0 (0)            | 0 (0)            | 0 (0)            | 0 (0)            | 0 (0)            | 0 (0)       |
|                                                  |                                  |                                   | 0 (0)            | 1 (1)            | 1 (1)            | 0 (0)            | 1 (1)            | 1 (1)            | 1 (1)       |
|                                                  |                                  |                                   | 0 (0)            | 0 (0)            | 0 (0)            | 0 (0)            | 1 (1)            | 0 (0)            | 2 (3)       |
| 32 (39)                                          | 33 (41)                          | 30 (39)                           | 9 (8)            | 28 (37)          | 28 (39)          | 27 (39)          |                  |                  |             |
| 0 (0)                                            | 0 (0)                            | 0 (0)                             | 7 (7)            | 2 (3)            | 3 (4)            | 2 (3)            |                  |                  |             |
| P Value*                                         |                                  |                                   | 10 <sup>-4</sup> | 0.001       |
| No. of observations available                    |                                  |                                   | 123              | 116              | 109              | 105              | 101              | 98               | 90          |
| Dynamic plateau pressure<br>(cmH <sub>2</sub> O) | Inhaled Se-<br>dation<br>Group   | Median value<br>[IQR]             | 26 [21; 28]      | 26 [22; 28]      | 26 [24; 29]      | 27 [23; 29]      | 26 [23; 30]      | 27 [23; 30]      | 27 [21; 30] |
|                                                  | Intravenous<br>Sedation<br>Group | Median value<br>[IQR]             | 26 [22; 29]      | 25 [21; 28]      | 26 [22; 29]      | 26 [24; 30]      | 27 [24; 30]      | 25 [23; 30]      | 25 [21; 28] |
|                                                  | P Value*                         |                                   |                  | 0.69             | 0.33             | 0.56             | 0.70             | 0.33             | 0.75        |
| No. of observations available                    |                                  |                                   | 193              | 187              | 182              | 176              | 173              | 163              | 153         |
| PEEP (cmH <sub>2</sub> O)                        | Inhaled Se-<br>dation<br>Group   | Median value<br>[IQR]             | 12 [10; 14]      | 12 [10; 13]      | 12 [9; 13]       | 12 [10; 14]      | 11 [10; 13]      | 12 [9; 13]       | 12 [10; 13] |
|                                                  | Intravenous<br>Sedation<br>Group | Median value<br>[IQR]             | 12 [10; 14]      | 12 [10; 14]      | 12 [10; 12]      | 12 [10; 14]      | 12 [9; 12]       | 10 [9; 13]       | 11 [8; 13]  |

|                                                              |                               |                              |                  |                |                |                |                |                |                |      |
|--------------------------------------------------------------|-------------------------------|------------------------------|------------------|----------------|----------------|----------------|----------------|----------------|----------------|------|
|                                                              |                               |                              | P Value*         | 0.99           | 0.96           | 0.38           | 0.73           | 0.77           | 0.66           | 0.32 |
| Expired tidal volume (mL/kg PBW)                             | No. of observations available |                              |                  | 190            | 184            | 180            | 170            | 167            | 157            | 148  |
|                                                              | Inhaled Sedation Group        | Median value [IQR]           | 6.9 [6.0; 8.0]   | 6.7 [6.1; 7.9] | 6.9 [6.3; 8.5] | 7.2 [6.2; 8.5] | 6.8 [6.1; 7.8] | 7.2 [6.3; 8.3] | 7.1 [6.3; 8.2] |      |
|                                                              | Intravenous Sedation Group    | Median value [IQR]           | 6.5 [5.9; 7.4]   | 6.7 [5.7; 7.3] | 6.5 [5.7; 7.4] | 6.7 [6.0; 7.8] | 6.7 [6.0; 7.5] | 6.7 [5.7; 7.8] | 6.9 [6.0; 8.0] |      |
|                                                              | P Value*                      |                              | 0.07             | 0.06           | 0.004          | 0.08           | 0.55           | 0.03           | 0.37           |      |
| Compliance of the respiratory system (mL/cmH <sub>2</sub> O) | No. of observations available |                              |                  | 122            | 115            | 109            | 103            | 100            | 96             | 89   |
|                                                              | Inhaled Sedation Group        | Median value [IQR]           | 37 [31; 43]      | 34 [26; 44]    | 29 [24; 39]    | 31 [26; 38]    | 32 [25; 38]    | 30 [24; 39]    | 32 [25; 42]    |      |
|                                                              | Intravenous Sedation Group    | Median value [IQR]           | 34 [27; 45]      | 35 [27; 40]    | 33 [25; 43]    | 33 [26; 39]    | 31 [25; 38]    | 30 [25; 39]    | 32 [25; 43]    |      |
|                                                              | P Value*                      |                              | 0.26             | 0.79           | 0.25           | 0.69           | 0.77           | 0.63           | 0.87           |      |
| Driving pressure (cmH <sub>2</sub> O)                        | No. of observations available |                              |                  | 122            | 54             | 109            | 103            | 100            | 96             | 89   |
|                                                              | Inhaled Sedation Group        | Median value [IQR]           | 12 [10; 15]      | 14 [9; 23]     | 15 [12; 17]    | 14 [12; 17]    | 15 [12; 17]    | 15 [12; 18]    | 14 [12; 18]    |      |
|                                                              | Intravenous Sedation Group    | Median value [IQR]           | 13 [10; 14]      | 15 [12; 33]    | 13 [10; 16]    | 14 [12; 16]    | 14 [12; 17]    | 14 [12; 17]    | 13 [12; 17]    |      |
|                                                              | P Value*                      |                              | 0.60             | 0.62           | 0.13           | 0.81           | 0.63           | 0.50           | 0.75           |      |
| Airway resistance (cmH <sub>2</sub> O/L/s)                   | No. of observations available |                              |                  | 62             | 116            | 53             | 53             | 48             | 47             | 44   |
|                                                              | Inhaled Sedation Group        | Median value [IQR]           | 14 [9; 22]       | 13 [11; 16]    | 15 [8; 18]     | 14 [7; 19]     | 15 [10; 17]    | 14 [8; 16]     | 13 [8; 18]     |      |
|                                                              | Intravenous Sedation Group    | Median value [IQR]           | 11 [7; 36]       | 13 [10; 15]    | 14 [9; 38]     | 14 [8; 28]     | 11 [10; 21]    | 14 [9; 17]     | 14 [8; 17]     |      |
|                                                              | P Value*                      |                              | 0.51             | 0.27           | 0.64           | 0.63           | 0.45           | 0.62           | 0.90           |      |
| Adjunctive therapies for ARDS                                | No. of observations available |                              |                  | 191            | 188            | 186            | 186            | 182            | 175            | 163  |
|                                                              | Inhaled Sedation Group        | Number of patients — no. (%) | 51 (48)          | 49 (46)        | 49 (45)        | 44 (41)        | 48 (46)        | 39 (39)        | 35 (37)        |      |
|                                                              | Intravenous Sedation Group    | Number of patients — no. (%) | 60 (71)          | 53 (65)        | 48 (62)        | 49 (62)        | 43 (56)        | 43 (58)        | 40 (58)        |      |
|                                                              | P Value*                      |                              | 10 <sup>-4</sup> | 0.007          | 0.03           | 0.005          | 0.18           | 0.01           | 0.01           |      |
| Recruitment maneuvers                                        | No. of observations available |                              |                  | 109            | 100            | 95             | 92             | 90             | 81             | 72   |
|                                                              | Inhaled Sedation Group        | Number of patients — no. (%) | 19 (38)          | 17 (36)        | 17 (35)        | 13 (30)        | 14 (29)        | 12 (32)        | 6 (18)         |      |
|                                                              | Intravenous Sedation Group    | Number of patients — no. (%) | 12 (20)          | 12 (23)        | 14 (30)        | 12 (25)        | 13 (31)        | 6 (14)         | 9 (23)         |      |
|                                                              | P Value*                      |                              | 0.04             | 0.14           | 0.56           | 0.63           | 0.85           | 0.06           | 0.61           |      |
| Neuromuscular blocking drugs                                 | No. of observations available |                              |                  | 110            | 100            | 96             | 89             | 90             | 80             | 74   |
|                                                              | Inhaled Sedation Group        | Number of patients — no. (%) | 32 (64)          | 28 (60)        | 28 (58)        | 23 (55)        | 22 (46)        | 17 (46)        | 15 (44)        |      |
|                                                              | Intravenous Sedation Group    | Number of patients — no. (%) | 25 (42)          | 24 (45)        | 22 (46)        | 20 (43)        | 20 (48)        | 21 (49)        | 24 (60)        |      |
|                                                              | P Value*                      |                              | 0.02             | 0.15           | 0.22           | 0.25           | 0.87           | 0.80           | 0.17           |      |
| Inhaled nitric oxide                                         | No. of observations available |                              |                  | 108            | 97             | 94             | 91             | 90             | 80             | 73   |
|                                                              | Inhaled Sedation Group        | Number of patients — no. (%) | 6 (12)           | 10 (22)        | 11 (23)        | 9 (20)         | 8 (17)         | 11 (24)        | 9 (27)         |      |
|                                                              | Intravenous Sedation Group    | Number of patients — no. (%) | 1 (2)            | 5 (10)         | 5 (11)         | 7 (15)         | 9 (21)         | 5 (12)         | 2 (5)          |      |

|                |                               | P Value*                     | 0.03    | 0.09    | 0.10    | 0.49    | 0.57    | 0.04    | 0.01    |
|----------------|-------------------------------|------------------------------|---------|---------|---------|---------|---------|---------|---------|
| Prone position | No. of observations available |                              | 107     | 99      | 95      | 92      | 90      | 81      | 73      |
|                | Inhaled Sedation Group        | Number of patients — no. (%) | 24 (51) | 21 (46) | 25 (52) | 21 (48) | 21 (44) | 18 (47) | 16 (47) |
|                | Intravenous Sedation Group    | Number of patients — no. (%) | 44 (73) | 31 (58) | 31 (66) | 27 (56) | 21 (50) | 23 (53) | 23 (59) |
|                | P Value*                      |                              | 0.02    | 0.20    | 0.17    | 0.41    | 0.55    | 0.58    | 0.31    |
|                | No. of observations available |                              | 108     | 95      | 95      | 91      | 89      | 78      | 71      |
| ECMO           | Inhaled Sedation Group        | Number of patients — no. (%) | 3 (6)   | 3 (4)   | 3 (6)   | 6 (14)  | 5 (10)  | 4 (11)  | 4 (13)  |
|                | Intravenous Sedation Group    | Number of patients — no. (%) | 6 (10)  | 6 (12)  | 6 (13)  | 6 (13)  | 6 (15)  | 6 (14)  | 7 (18)  |
|                | P Value*                      |                              | 0.45    | 0.38    | 0.28    | 0.84    | 0.55    | 0.74    | 0.53    |

\* *P* values were calculated for comparisons between patients receiving inhaled sedation (for at least 24 hours) and those receiving only intravenous sedation through day 28. Percentages are expressed out of available individuals for each variable, and may not sum to 100% due to rounding. Quantitative variables are expressed as median [IQR], qualitative variables as number (%), unless specified otherwise. ARDS: acute respiratory distress syndrome; APRV: airway pressure release ventilation; HFNO: high flow nasal oxygenation; CPAP: continuous positive airway pressure; NIV: non-invasive ventilation; PEEP: positive end expiratory pressure; Vt: tidal volume; PBW: predicted body weight; ECMO: extracorporeal membrane oxygenation.

**Table S10.** Physiological measures of lung function and ventilator settings through day 7 in patients receiving inhaled sedation and those receiving intravenous sedation only.

| Variable                                                      | Inhaled Sedation Group<br>(n=111) |                | Intravenous Sedation Group<br>(n=85) |                | P Value for<br>Time × Group<br>Interaction |
|---------------------------------------------------------------|-----------------------------------|----------------|--------------------------------------|----------------|--------------------------------------------|
| <b>PaO<sub>2</sub>/FiO<sub>2</sub>, mmHg</b>                  | No. of available individuals      |                | No. of available individuals         |                |                                            |
| Day 0                                                         | 108                               | 128 [94; 165]  | 76                                   | 135 [104; 174] | Reference                                  |
| Day 1                                                         | 99                                | 170 [116; 203] | 83                                   | 158 [125; 202] | 0.94                                       |
| Day 2                                                         | 103                               | 155 [118; 195] | 81                                   | 172 [119; 211] | 0.88                                       |
| Day 3                                                         | 99                                | 140 [112; 191] | 76                                   | 157 [126; 215] | 0.43                                       |
| Day 4                                                         | 97                                | 153 [117; 180] | 77                                   | 168 [120; 210] | 0.20                                       |
| Day 5                                                         | 93                                | 145 [106; 200] | 75                                   | 164 [113; 209] | 0.42                                       |
| Day 6                                                         | 88                                | 139 [113; 195] | 73                                   | 142 [117; 196] | 0.83                                       |
| Day 7                                                         | 87                                | 138 [115; 203] | 68                                   | 171 [114; 216] | 0.16                                       |
| <b>PaCO<sub>2</sub>, mmHg</b>                                 | No. of available individuals      |                | No. of available individuals         |                |                                            |
| Day 0                                                         | 109                               | 46 [41; 52]    | 83                                   | 44 [38; 51]    | Reference                                  |
| Day 1                                                         | 101                               | 44 [40; 51]    | 84                                   | 44 [40; 48]    | 0.35                                       |
| Day 2                                                         | 104                               | 46 [42; 53]    | 82                                   | 45 [40; 50]    | 0.25                                       |
| Day 3                                                         | 100                               | 47 [42; 55]    | 79                                   | 45 [41; 52]    | 0.50                                       |
| Day 4                                                         | 99                                | 48 [43; 55]    | 79                                   | 45 [40; 51]    | 0.77                                       |
| Day 5                                                         | 96                                | 49 [43; 57]    | 77                                   | 44 [40; 52]    | 0.04                                       |
| Day 6                                                         | 91                                | 50 [42; 59]    | 74                                   | 46 [40; 55]    | 0.48                                       |
| Day 7                                                         | 89                                | 51 [43; 60]    | 69                                   | 47 [42; 55]    | 0.36                                       |
| <b>Dynamic inspiratory plateau pressure, cmH<sub>2</sub>O</b> | No. of available individuals      |                | No. of available individuals         |                |                                            |
| Day 0                                                         | 62                                | 26 [22; 28]    | 63                                   | 25 [22; 30]    | Reference                                  |
| Day 1                                                         | 59                                | 26 [21; 28]    | 64                                   | 26 [22; 29]    | 0.96                                       |
| Day 2                                                         | 55                                | 26 [22; 28]    | 61                                   | 25 [21; 28]    | 0.03                                       |
| Day 3                                                         | 50                                | 26 [24; 29]    | 59                                   | 26 [22; 29]    | 0.15                                       |
| Day 4                                                         | 50                                | 27 [23; 29]    | 55                                   | 26 [24; 30]    | 0.32                                       |
| Day 5                                                         | 46                                | 26 [23; 29]    | 55                                   | 27 [24; 30]    | 0.95                                       |
| Day 6                                                         | 46                                | 27 [23; 30]    | 52                                   | 25 [23; 30]    | 0.11                                       |
| Day 7                                                         | 41                                | 27 [21; 30]    | 49                                   | 25 [21; 28]    | 0.07                                       |

|                                                                  |                                     |                |                                     |                |                  |
|------------------------------------------------------------------|-------------------------------------|----------------|-------------------------------------|----------------|------------------|
| <b>Compliance of the respiratory system, mL/cmH<sub>2</sub>O</b> |                                     |                |                                     |                |                  |
|                                                                  | <i>No. of available individuals</i> |                | <i>No. of available individuals</i> |                |                  |
| <i>Day 0</i>                                                     | 62                                  | 34 [28; 43]    | 63                                  | 34 [26; 40]    | <i>Reference</i> |
| <i>Day 1</i>                                                     | 58                                  | 37 [31; 43]    | 64                                  | 34 [27; 45]    | 0.78             |
| <i>Day 2</i>                                                     | 55                                  | 34 [26; 44]    | 61                                  | 35 [27; 40]    | 0.21             |
| <i>Day 3</i>                                                     | 50                                  | 29 [24; 39]    | 59                                  | 33 [25; 43]    | 0.22             |
| <i>Day 4</i>                                                     | 49                                  | 31 [26; 38]    | 54                                  | 33 [26; 39]    | 0.44             |
| <i>Day 5</i>                                                     | 45                                  | 32 [25; 38]    | 55                                  | 31 [25; 38]    | 0.72             |
| <i>Day 6</i>                                                     | 44                                  | 30 [24; 39]    | 52                                  | 31 [25; 39]    | 0.01             |
| <i>Day 7</i>                                                     | 40                                  | 32 [25; 42]    | 49                                  | 32 [25; 43]    | 0.34             |
| <b>Driving pressure, cmH<sub>2</sub>O</b>                        |                                     |                |                                     |                |                  |
|                                                                  | <i>No. of available individuals</i> |                | <i>No. of available individuals</i> |                |                  |
| <i>Day 0</i>                                                     | 62                                  | 13 [10; 15]    | 63                                  | 12 [10; 16]    | <i>Reference</i> |
| <i>Day 1</i>                                                     | 58                                  | 12 [10; 15]    | 64                                  | 13 [10; 14]    | 0.97             |
| <i>Day 2</i>                                                     | 55                                  | 13 [11; 16]    | 61                                  | 13 [10; 15]    | 0.09             |
| <i>Day 3</i>                                                     | 50                                  | 15 [12; 17]    | 59                                  | 13 [10; 16]    | 0.08             |
| <i>Day 4</i>                                                     | 49                                  | 14 [12; 17]    | 55                                  | 14 [12; 16]    | 0.76             |
| <i>Day 5</i>                                                     | 45                                  | 14 [12; 17]    | 55                                  | 15 [12; 17]    | 0.81             |
| <i>Day 6</i>                                                     | 44                                  | 15 [12; 18]    | 52                                  | 14 [12; 17]    | 0.22             |
| <i>Day 7</i>                                                     | 40                                  | 14 [12; 18]    | 49                                  | 13 [12; 17]    | 0.26             |
| <b>Airway resistance, cmH<sub>2</sub>O/L/s</b>                   |                                     |                |                                     |                |                  |
|                                                                  | <i>No. of available individuals</i> |                | <i>No. of available individuals</i> |                |                  |
| <i>Day 0</i>                                                     | 51                                  | 14 [12; 17]    | 16                                  | 15 [11; 27]    | <i>Reference</i> |
| <i>Day 1</i>                                                     | 47                                  | 14 [9; 22]     | 15                                  | 11 [7; 36]     | 0.39             |
| <i>Day 2</i>                                                     | 43                                  | 14 [9; 23]     | 11                                  | 15 [12; 33]    | 0.49             |
| <i>Day 3</i>                                                     | 41                                  | 15 [8; 18]     | 12                                  | 14 [9; 38]     | 0.33             |
| <i>Day 4</i>                                                     | 43                                  | 14 [7; 19]     | 10                                  | 14 [8; 28]     | 0.85             |
| <i>Day 5</i>                                                     | 36                                  | 15 [10; 17]    | 12                                  | 11 [10; 21]    | 0.41             |
| <i>Day 6</i>                                                     | 34                                  | 14 [8; 16]     | 13                                  | 14 [9; 17]     | 0.86             |
| <i>Day 7</i>                                                     | 34                                  | 13 [8; 18]     | 10                                  | 14 [8; 17]     | 0.82             |
| <b>Tidal volume, mL/kg PBW</b>                                   |                                     |                |                                     |                |                  |
|                                                                  | <i>No. of available individuals</i> |                | <i>No. of available individuals</i> |                |                  |
| <i>Day 0</i>                                                     | 108                                 | 6.6 [6.0; 7.4] | 82                                  | 6.4 [5.5; 7.1] | <i>Reference</i> |
| <i>Day 1</i>                                                     | 109                                 | 6.9 [6.0; 8.0] | 81                                  | 6.5 [5.9; 7.4] | 0.95             |
| <i>Day 2</i>                                                     | 105                                 | 6.7 [6.1; 7.9] | 79                                  | 6.7 [5.7; 7.3] | 0.55             |
| <i>Day 3</i>                                                     | 105                                 | 6.9 [6.3; 8.5] | 75                                  | 6.5 [5.7; 7.4] | 0.08             |
| <i>Day 4</i>                                                     | 100                                 | 7.2 [6.2; 8.5] | 70                                  | 6.7 [6.0; 7.8] | 0.61             |
| <i>Day 5</i>                                                     | 97                                  | 6.8 [6.1; 7.8] | 70                                  | 6.7 [6.0; 7.5] | 0.39             |
| <i>Day 6</i>                                                     | 90                                  | 7.2 [6.3; 8.3] | 67                                  | 6.7 [5.7; 7.8] | 0.91             |
| <i>Day 7</i>                                                     | 84                                  | 7.1 [6.3; 8.2] | 64                                  | 6.9 [6.0; 8.0] | 0.85             |
| <b>Positive end-expiratory pressure, cmH<sub>2</sub>O</b>        |                                     |                |                                     |                |                  |
|                                                                  | <i>No. of available individuals</i> |                | <i>No. of available individuals</i> |                |                  |
| <i>Day 0</i>                                                     | 110                                 | 12 [10; 14]    | 85                                  | 12 [10; 14]    | <i>Reference</i> |
| <i>Day 1</i>                                                     | 110                                 | 12 [10; 14]    | 83                                  | 12 [10; 14]    | 0.27             |
| <i>Day 2</i>                                                     | 106                                 | 12 [10; 13]    | 81                                  | 12 [10; 14]    | 0.52             |
| <i>Day 3</i>                                                     | 105                                 | 12 [9; 13]     | 77                                  | 12 [10; 12]    | 0.22             |
| <i>Day 4</i>                                                     | 104                                 | 12 [10; 14]    | 72                                  | 12 [10; 14]    | 0.32             |
| <i>Day 5</i>                                                     | 101                                 | 12 [9; 12]     | 72                                  | 11 [10; 13]    | 0.26             |
| <i>Day 6</i>                                                     | 94                                  | 12 [9; 13]     | 69                                  | 10 [9; 13]     | 0.85             |
| <i>Day 7</i>                                                     | 87                                  | 12 [10; 13]    | 66                                  | 11 [8; 13]     | 0.42             |
| <b>Fraction of inspired oxygen, %</b>                            |                                     |                |                                     |                |                  |
|                                                                  | <i>No. of available individuals</i> |                | <i>No. of available individuals</i> |                |                  |
| <i>Day 0</i>                                                     | 109                                 | 70 [55; 90]    | 76                                  | 70 [52; 80]    | <i>Reference</i> |
| <i>Day 1</i>                                                     | 100                                 | 51 [40; 60]    | 83                                  | 53 [40; 70]    | 0.67             |
| <i>Day 2</i>                                                     | 103                                 | 50 [40; 65]    | 81                                  | 46 [38; 61]    | 0.82             |
| <i>Day 3</i>                                                     | 100                                 | 51 [45; 61]    | 76                                  | 50 [39; 60]    | 0.35             |
| <i>Day 4</i>                                                     | 97                                  | 55 [45; 64]    | 78                                  | 50 [35; 60]    | 0.05             |
| <i>Day 5</i>                                                     | 93                                  | 60 [45; 70]    | 75                                  | 50 [40; 70]    | 0.31             |

|              |    |             |    |             |      |
|--------------|----|-------------|----|-------------|------|
| <i>Day 6</i> | 88 | 55 [45; 65] | 73 | 54 [40; 70] | 0.37 |
| <i>Day 7</i> | 87 | 50 [40; 65] | 68 | 50 [35; 66] | 0.38 |

  

| <b>Respiratory rate, per minute</b> | <i>No. of available individuals</i> | <i>No. of available individuals</i> |    |             |                  |
|-------------------------------------|-------------------------------------|-------------------------------------|----|-------------|------------------|
| <i>Day 0</i>                        | 89                                  | 22 [20; 28]                         | 45 | 22 [18; 25] | <i>Reference</i> |
| <i>Day 1</i>                        | 71                                  | 26 [22; 30]                         | 36 | 24 [20; 27] | 0.69             |
| <i>Day 2</i>                        | 62                                  | 26 [24; 30]                         | 28 | 26 [22; 29] | 0.87             |
| <i>Day 3</i>                        | 55                                  | 28 [24; 30]                         | 28 | 24 [22; 28] | 0.26             |
| <i>Day 4</i>                        | 52                                  | 28 [24; 30]                         | 23 | 27 [24; 29] | 0.31             |
| <i>Day 5</i>                        | 47                                  | 28 [24; 30]                         | 22 | 28 [24; 30] | 0.79             |
| <i>Day 6</i>                        | 44                                  | 28 [26; 30]                         | 16 | 28 [24; 30] | 0.92             |
| <i>Day 7</i>                        | 45                                  | 30 [26; 31]                         | 16 | 26 [24; 29] | 0.39             |

PaO<sub>2</sub>: partial pressure of oxygen in arterial blood; FiO<sub>2</sub>: fraction of inspired oxygen; PaCO<sub>2</sub>: partial pressure of carbon dioxide in arterial blood; PBW: predicted body weight.

**Table S11.** Sedation practices and measures from the ABCDEF bundle implemented during the first seven days after inclusion.

|                                                                                                                                                                                                                   |                               |                              | <b>Day 1</b>     | <b>Day 2</b>     | <b>Day 3</b>     | <b>Day 4</b>     | <b>Day 5</b>     | <b>Day 6</b>     | <b>Day 7</b>     |
|-------------------------------------------------------------------------------------------------------------------------------------------------------------------------------------------------------------------|-------------------------------|------------------------------|------------------|------------------|------------------|------------------|------------------|------------------|------------------|
| Receiving sedation                                                                                                                                                                                                | No. of observations available |                              | 195              | 191              | 185              | 187              | 182              | 175              | 166              |
|                                                                                                                                                                                                                   | Inhaled Sedation Group        | Number of patients — no. (%) | 110 (99)         | 103 (95)         | 101 (93)         | 98 (92)          | 95 (90)          | 89 (88)          | 85 (88)          |
|                                                                                                                                                                                                                   | Intravenous Sedation Group    | Number of patients — no. (%) | 82 (98)          | 81 (99)          | 74 (93)          | 69 (86)          | 69 (90)          | 65 (88)          | 63 (91)          |
|                                                                                                                                                                                                                   | P Value*                      |                              | 0.41             | 0.12             | 0.97             | 0.24             | 0.85             | 0.96             | 0.45             |
|                                                                                                                                                                                                                   |                               |                              |                  |                  |                  |                  |                  |                  |                  |
| If intravenous sedation<br><i>Sedation with propofol</i><br><i>Sedation with midazolam</i><br><i>Sedation with dexmedetomidine</i><br><i>Sedation with another agent agent</i>                                    | No. of observations available |                              | 192              | 184              | 175              | 167              | 164              | 154              | 148              |
|                                                                                                                                                                                                                   | Inhaled Sedation Group        |                              | 43 (70)          | 34 (68)          | 33 (75)          | 32 (71)          | 32 (70)          | 31 (70)          | 26 (63)          |
|                                                                                                                                                                                                                   |                               | Number of patients — no. (%) | 15 (25)          | 12 (24)          | 6 (14)           | 6 (13)           | 6 (13)           | 4 (9)            | 6 (15)           |
|                                                                                                                                                                                                                   |                               |                              | 2 (3)            | 2 (4)            | 3 (7)            | 6 (13)           | 7 (15)           | 8 (18)           | 6 (15)           |
|                                                                                                                                                                                                                   |                               |                              | 1 (2)            | 2 (4)            | 2 (5)            | 1 (2)            | 0 (0)            | 1 (2)            | 1 (2)            |
|                                                                                                                                                                                                                   | Intravenous Sedation Group    |                              | 61 (74)          | 60 (75)          | 52 (71)          | 46 (68)          | 42 (62)          | 38 (59)          | 38 (61)          |
|                                                                                                                                                                                                                   |                               | Number of patients — no. (%) | 21 (26)          | 19 (24)          | 18 (25)          | 17 (25)          | 17 (25)          | 20 (31)          | 17 (27)          |
|                                                                                                                                                                                                                   |                               |                              | 0 (0)            | 1 (1)            | 2 (3)            | 3 (3)            | 5 (7)            | 4 (6)            | 5 (8)            |
|                                                                                                                                                                                                                   |                               |                              | 0 (0)            | 0 (0)            | 1 (1)            | 2 (3)            | 3 (4)            | 1 (2)            | 1 (2)            |
|                                                                                                                                                                                                                   | P Value*                      |                              | 10 <sup>-4</sup> |
| If inhaled sedation<br><i>Sedation with Sevoflurane</i><br><i>Sedation with Isoflurane</i><br><i>Use of Sedaconda-ACD (100 mL)</i><br><i>Use of Sedaconda-ACD-S (50 mL)</i><br><i>Use of ventilator/vaporizer</i> | No. of observations available |                              | 110              | 184              | 189              | 167              | 164              | 154              | 148              |
|                                                                                                                                                                                                                   | Inhaled Sedation Group        |                              | 49 (45)          | 53 (51)          | 41 (72)          | 29 (55)          | 21 (43)          | 17 (38)          | 16 (36)          |
|                                                                                                                                                                                                                   |                               | Number of patients — no. (%) | 39 (80)          | 41 (77)          | 16 (28)          | 24 (45)          | 28 (57)          | 28 (62)          | 28 (64)          |
|                                                                                                                                                                                                                   |                               |                              | 10 (20)          | 12 (23)          | 1 (2)            | 43 (81)          | 2 (4)            | 3 (7)            | 2 (5)            |
|                                                                                                                                                                                                                   |                               |                              | 45 (92)          | 47 (89)          | 47 (82)          | 2 (4)            | 38 (78)          | 35 (78)          | 35 (80)          |
|                                                                                                                                                                                                                   |                               |                              | 4 (8)            | 6 (11)           | 9 (16)           | 8 (15)           | 9 (18)           | 7 (16)           | 7 (16)           |
|                                                                                                                                                                                                                   | Intravenous Sedation Group    |                              | 0 (0)            | 0 (0)            | 0 (0)            | 0 (0)            | 0 (0)            | 0 (0)            | 0 (0)            |
|                                                                                                                                                                                                                   |                               | Number of patients — no. (%) | 0 (0)            | 0 (0)            | 0 (0)            | 0 (0)            | 0 (0)            | 0 (0)            | 0 (0)            |
|                                                                                                                                                                                                                   |                               |                              | 0 (0)            | 0 (0)            | 0 (0)            | 0 (0)            | 0 (0)            | 0 (0)            | 0 (0)            |
|                                                                                                                                                                                                                   |                               |                              | 0 (0)            | 0 (0)            | 0 (0)            | 0 (0)            | 0 (0)            | 0 (0)            | 0 (0)            |
|                                                                                                                                                                                                                   | P Value*                      |                              | 10 <sup>-4</sup> |
| Use of a second sedative agent                                                                                                                                                                                    | No. of observations available |                              | 188              | 183              | 173              | 165              | 162              | 162              | 146              |
|                                                                                                                                                                                                                   | Inhaled Sedation Group        | Number of patients — no. (%) | 59 (55)          | 60 (58)          | 67 (68)          | 71 (74)          | 70 (75)          | 70 (75)          | 55 (66)          |
|                                                                                                                                                                                                                   | Intravenous Sedation Group    | Number of patients — no. (%) | 66 (83)          | 70 (88)          | 65 (88)          | 59 (86)          | 54 (72)          | 54 (78)          | 49 (78)          |
|                                                                                                                                                                                                                   | P Value*                      |                              | 10 <sup>-4</sup> | 10 <sup>-4</sup> | 0.002            | 0.07             | 0.66             | 0.66             | 0.13             |
|                                                                                                                                                                                                                   |                               |                              |                  |                  |                  |                  |                  |                  |                  |
| Maximal RASS observed                                                                                                                                                                                             | No. of observations available |                              | 183              | 174              | 166              | 161              | 160              | 151              | 145              |
|                                                                                                                                                                                                                   | Inhaled Sedation Group        | Median value [IQR]           | -4 [-5; -3]      | -4 [-5; -3]      | -4 [-5; -4]      | -4 [-5; -4]      | -5 [-4; -4]      | -4 [-5; -4]      | -4 [-5; -4]      |
|                                                                                                                                                                                                                   |                               |                              |                  |                  |                  |                  |                  |                  |                  |

|                                                                     |                               |                              |                  |                  |                  |                  |                  |                  |                  |
|---------------------------------------------------------------------|-------------------------------|------------------------------|------------------|------------------|------------------|------------------|------------------|------------------|------------------|
|                                                                     | Intravenous Sedation Group    | Median value [IQR]           | -4 [-5; -4]      | 4 [-5; -4]       | -4 [-5; -4]      | -4 [-5; -4]      | -5 [-4; -4]      | -4 [-5; -4]      | -4 [-5; -4]      |
|                                                                     | P Value*                      |                              | 0.94             | 0.54             | 0.44             | 0.74             | 0.97             | 0.15             | 0.15             |
| Minimal RASS observed                                               | No. of observations available |                              | 184              | 175              | 169              | 161              | 160              | 150              | 143              |
|                                                                     | Inhaled Sedation Group        | Median value [IQR]           | -4 [-5; -4]      | 4 [-5; -4]       | -5 [-5; -4]      | -5 [-5; -4]      | -5 [-5; -4]      | -5 [-5; -4]      | -4 [-5; -3]      |
|                                                                     | Intravenous Sedation Group    | Median value [IQR]           | -5 [-5; -4]      | -5 [-5; -4]      | -4 [-5; -3]      | -4 [-5; -3]      | -4 [-5; -3]      | -4 [-5; -3]      | -5 [-5; -4]      |
|                                                                     | P Value*                      |                              | 10 <sup>-4</sup> | 0.04             | 10 <sup>-4</sup> | 10 <sup>-4</sup> | 0.01             | 0.01             | 0.01             |
| Maximal BPS observed                                                | No. of observations available |                              | 106              | 99               | 96               | 95               | 91               | 86               | 83               |
|                                                                     | Inhaled Sedation Group        | Median value [IQR]           | 3 [3; 3]         | 3 [3; 3]         | 3 [3; 3]         | 3 [3; 4]         | 3 [3; 4]         | 3 [3; 3]         | 3 [3; 5]         |
|                                                                     | Intravenous Sedation Group    | Median value [IQR]           | 3 [3; 4]         | 3 [3; 4]         | 3 [3; 4]         | 3 [3; 4]         | 3 [3; 4]         | 3 [3; 4]         | 3 [3; 4]         |
|                                                                     | P Value*                      |                              | 0.51             | 0.96             | 0.12             | 0.57             | 0.97             | 0.15             | 0.36             |
| Minimal BPS observed                                                | No. of observations available |                              | 105              | 99               | 94               | 95               | 91               | 86               | 83               |
|                                                                     | Inhaled Sedation Group        | Median value [IQR]           | 3 [3; 3]         | 3 [3; 3]         | 3 [3; 3]         | 3 [3; 3]         | 3 [3; 3]         | 3 [3; 3]         | 3 [3; 3]         |
|                                                                     | Intravenous Sedation Group    | Median value [IQR]           | 3 [3; 3]         | 3 [3; 3]         | 3 [3; 3]         | 3 [3; 3]         | 3 [3; 3]         | 3 [3; 3]         | 3 [3; 3]         |
|                                                                     | P Value*                      |                              | 0.28             | 0.52             | 0.23             | 0.83             | 0.39             | 0.90             | 0.70             |
| BIS monitoring available                                            | No. of observations available |                              | 181              | 171              | 166              | 156              | 149              | 145              | 137              |
|                                                                     | Inhaled Sedation Group        | Number of patients — no. (%) | 16 (16)          | 12 (13)          | 12 (13)          | 10 (11)          | 10 (12)          | 10 (12)          | 7 (9)            |
|                                                                     | Intravenous Sedation Group    | Number of patients — no. (%) | 12 (15)          | 11 (14)          | 10 (14)          | 11 (16)          | 9 (13)           | 7 (11)           | 8 (13)           |
|                                                                     | P Value*                      |                              | 0.88             | 0.91             | 0.88             | 0.38             | 0.82             | 0.84             | 0.48             |
| Highest BIS value                                                   | No. of observations available |                              | 28               | 23               | 22               | 20               | 19               | 17               | 15               |
|                                                                     | Inhaled Sedation Group        | Median value [IQR]           | 55 [47; 59]      | 58 [52; 64]      | 54 [42; 64]      | 57 [46; 66]      | 58 [55; 72]      | 58 [44; 62]      | 60 [43; 70]      |
|                                                                     | Intravenous Sedation Group    | Median value [IQR]           | 62 [50; 68]      | 53 [43; 65]      | 55 [43; 66]      | 63 [51; 74]      | 66 [58; 88]      | 61 [54; 77]      | 61 [44; 71]      |
|                                                                     | P Value*                      |                              | 0.13             | 0.28             | 0.84             | 0.55             | 0.33             | 0.59             | 0.91             |
| Lowest BIS value                                                    | No. of observations available |                              | 28               | 23               | 22               | 20               | 19               | 17               | 15               |
|                                                                     | Inhaled Sedation Group        | Median value [IQR]           | 40 [38; 42]      | 41 [34; 43]      | 39 [30; 42]      | 41 [18; 42]      | 36 [16; 43]      | 30 [18; 39]      | 38 [15; 42]      |
|                                                                     | Intravenous Sedation Group    | Median value [IQR]           | 41 [31; 46]      | 38 [30; 44]      | 40 [28; 45]      | 36 [31; 44]      | 40 [31; 42]      | 35 [27; 44]      | 30 [17; 40]      |
|                                                                     | P Value*                      |                              | 0.66             | 0.69             | 0.53             | 0.73             | 0.49             | 0.49             | 0.52             |
| CAM-ICU<br>Positive<br>Negative<br>Unable to assess<br>Not assessed | No. of observations available |                              | 145              | 143              | 145              | 142              | 139              | 132              | 125              |
|                                                                     | Inhaled Sedation Group        | Number of patients — no. (%) | 1 (1)            | 3 (4)            | 5 (7)            | 5 (7)            | 3 (4)            | 4 (6)            | 3 (5)            |
|                                                                     |                               |                              | 1 (1)            | 4 (6)            | 4 (5)            | 6 (8)            | 5 (7)            | 5 (7)            | 4 (6)            |
|                                                                     |                               |                              | 42 (60)          | 37 (51)          | 35 (48)          | 30 (42)          | 30 (43)          | 30 (45)          | 29 (45)          |
|                                                                     |                               |                              | 26 (37)          | 28 (39)          | 29 (40)          | 30 (42)          | 32 (46)          | 28 (42)          | 28 (44)          |
|                                                                     | Intravenous Sedation Group    | Number of patients — no. (%) | 0 (0)            | 0 (0)            | 0 (0)            | 0 (0)            | 3 (4)            | 1 (2)            | 3 (5)            |
|                                                                     |                               |                              | 2 (3)            | 1 (1)            | 1 (1)            | 4 (6)            | 2 (3)            | 3 (5)            | 2 (3)            |
|                                                                     |                               |                              | 10 (13)          | 9 (13)           | 7 (10)           | 3 (4)            | 5 (7)            | 5 (8)            | 4 (7)            |
|                                                                     |                               |                              | 63 (84)          | 61 (86)          | 64 (89)          | 64 (90)          | 59 (86)          | 56 (86)          | 52 (85)          |
|                                                                     | P Value*                      |                              | 10 <sup>-4</sup> |
| ABCDEF Bundle                                                       |                               |                              |                  |                  |                  |                  |                  |                  |                  |
| Was the patient on the vent?                                        | No. of observations available |                              | 183              | 179              | 176              | 175              | 171              | 164              | 154              |

|                                                                                                                                                                                                                                                                                   |                                            |                                   |         |         |         |         |         |         |         |
|-----------------------------------------------------------------------------------------------------------------------------------------------------------------------------------------------------------------------------------------------------------------------------------|--------------------------------------------|-----------------------------------|---------|---------|---------|---------|---------|---------|---------|
|                                                                                                                                                                                                                                                                                   | Inhaled Se-<br>dation<br>Group             | Number of pa-<br>tients — no. (%) | 87 (86) | 86 (88) | 84 (86) | 83 (86) | 80 (84) | 75 (82) | 69 (79) |
|                                                                                                                                                                                                                                                                                   | Intravenous<br>Sedation<br>Group           | Number of pa-<br>tients — no. (%) | 63 (77) | 63 (78) | 61 (78) | 58 (74) | 55 (72) | 54 (74) | 49 (73) |
|                                                                                                                                                                                                                                                                                   | P Value*                                   |                                   | 0.10    | 0.08    | 0.19    | 0.06    | 0.06    | 0.19    | 0.37    |
| Did the patient get an SAT?<br>If not, reason:<br>Active seizures<br>Alcohol withdrawal<br>Agitation<br>Paralytics/targeted deep sedation<br>Hemodynamic instability<br>Myocardial ischemia<br>High intracranial pressure<br>Respiratory instability<br>Patient off unit<br>Other | No. of observations available              |                                   | 182     | 177     | 196     | 167     | 163     | 154     | 148     |
|                                                                                                                                                                                                                                                                                   |                                            |                                   | 15 (15) | 11 (11) | 19 (20) | 18 (19) | 16 (17) | 23 (27) | 15 (18) |
|                                                                                                                                                                                                                                                                                   | Inhaled Se-<br>dation<br>Group             | Number of pa-<br>tients — no. (%) | 0       | 0       | 0       | 0       | 0       | 0       | 1       |
|                                                                                                                                                                                                                                                                                   |                                            |                                   | 0       | 0       | 0       | 0       | 0       | 0       | 0       |
|                                                                                                                                                                                                                                                                                   |                                            |                                   | 0       | 0       | 0       | 1       | 0       | 0       | 0       |
|                                                                                                                                                                                                                                                                                   |                                            |                                   | 47      | 49      | 44      | 12      | 41      | 38      | 35      |
|                                                                                                                                                                                                                                                                                   |                                            |                                   | 3       | 2       | 1       | 3       | 5       | 2       | 2       |
|                                                                                                                                                                                                                                                                                   |                                            |                                   | 0       | 0       | 0       | 1       | 1       | 0       | 0       |
|                                                                                                                                                                                                                                                                                   |                                            |                                   | 0       | 0       | 0       | 0       | 0       | 0       | 0       |
|                                                                                                                                                                                                                                                                                   |                                            |                                   | 32      | 25      | 22      | 25      | 22      | 19      | 17      |
|                                                                                                                                                                                                                                                                                   |                                            |                                   | 0       | 0       | 0       | 0       | 0       | 0       | 0       |
|                                                                                                                                                                                                                                                                                   |                                            |                                   | 17      | 22      | 19      | 16      | 20      | 14      | 20      |
|                                                                                                                                                                                                                                                                                   |                                            |                                   | 3 (4)   | 9 (11)  | 11 (15) | 16 (22) | 12 (17) | 12 (18) | 15 (23) |
|                                                                                                                                                                                                                                                                                   |                                            |                                   | 0       | 0       | 0       | 0       | 0       | 0       | 0       |
|                                                                                                                                                                                                                                                                                   |                                            |                                   | 0       | 0       | 0       | 0       | 0       | 0       | 0       |
|                                                                                                                                                                                                                                                                                   |                                            |                                   | 0       | 1       | 0       | 0       | 0       | 0       | 0       |
|                                                                                                                                                                                                                                                                                   |                                            |                                   | 53      | 50      | 44      | 39      | 40      | 37      | 32      |
|                                                                                                                                                                                                                                                                                   | 3                                          | 3                                 | 3       | 4       | 3       | 1       | 1       |         |         |
|                                                                                                                                                                                                                                                                                   | 0                                          | 0                                 | 0       | 0       | 0       | 0       | 1       |         |         |
|                                                                                                                                                                                                                                                                                   | 0                                          | 0                                 | 0       | 0       | 0       | 0       | 0       |         |         |
|                                                                                                                                                                                                                                                                                   | 52                                         | 41                                | 36      | 28      | 30      | 31      | 27      |         |         |
|                                                                                                                                                                                                                                                                                   | 0                                          | 0                                 | 0       | 0       | 0       | 0       | 0       |         |         |
|                                                                                                                                                                                                                                                                                   | 5                                          | 5                                 | 6       | 5       | 6       | 7       | 6       |         |         |
| P Value*                                                                                                                                                                                                                                                                          |                                            | 0.01                              | 0.99    | 0.37    | 0.66    | 0.90    | 0.18    | 0.45    |         |
| Did the patient get an SBT?<br>If not, reason:<br>Did not pass SAT, no SBT<br>Patient off unit<br>Agitation<br>Oxygen saturation <88%<br>FiO <sub>2</sub> >50%<br>PEEP >7.5 cmH <sub>2</sub> O<br>Myocardial ischemia<br>Significant vasopressor use<br>Other                     | No. of observations available              |                                   | 180     | 177     | 172     | 166     | 163     | 155     | 148     |
|                                                                                                                                                                                                                                                                                   |                                            |                                   | 15 (15) | 15 (15) | 18 (19) | 21 (22) | 21 (23) | 27 (31) | 16 (19) |
|                                                                                                                                                                                                                                                                                   | Inhaled Se-<br>dation<br>Group             | Number of pa-<br>tients — no. (%) | 37      | 37      | 33      | 32      | 31      | 24      | 25      |
|                                                                                                                                                                                                                                                                                   |                                            |                                   | 0       | 0       | 0       | 0       | 0       | 0       | 0       |
|                                                                                                                                                                                                                                                                                   |                                            |                                   | 1       | 1       | 0       | 1       | 1       | 0       | 0       |
|                                                                                                                                                                                                                                                                                   |                                            |                                   | 3       | 0       | 2       | 3       | 4       | 4       | 3       |
|                                                                                                                                                                                                                                                                                   |                                            |                                   | 21      | 15      | 9       | 18      | 15      | 19      | 14      |
|                                                                                                                                                                                                                                                                                   |                                            |                                   | 40      | 36      | 35      | 31      | 32      | 29      | 30      |
|                                                                                                                                                                                                                                                                                   |                                            |                                   | 0       | 0       | 0       | 0       | 0       | 0       | 0       |
|                                                                                                                                                                                                                                                                                   |                                            |                                   | 3       | 2       | 1       | 3       | 5       | 4       | 2       |
|                                                                                                                                                                                                                                                                                   |                                            |                                   | 15      | 20      | 17      | 14      | 13      | 8       | 16      |
|                                                                                                                                                                                                                                                                                   |                                            |                                   | 3 (4)   | 14 (18) | 14 (19) | 18 (25) | 19 (27) | 12 (18) | 18 (28) |
|                                                                                                                                                                                                                                                                                   |                                            |                                   | 48      | 38      | 39      | 33      | 30      | 32      | 27      |
|                                                                                                                                                                                                                                                                                   |                                            |                                   | 0       | 0       | 0       | 0       | 0       | 0       | 0       |
|                                                                                                                                                                                                                                                                                   |                                            |                                   | 0       | 1       | 0       | 0       | 0       | 1       | 0       |
|                                                                                                                                                                                                                                                                                   |                                            |                                   | 0       | 0       | 2       | 0       | 1       | 1       | 1       |
|                                                                                                                                                                                                                                                                                   |                                            |                                   | 18      | 10      | 8       | 9       | 6       | 5       | 4       |
|                                                                                                                                                                                                                                                                                   | 38                                         | 34                                | 31      | 27      | 25      | 23      | 19      |         |         |
|                                                                                                                                                                                                                                                                                   | 0                                          | 0                                 | 0       | 0       | 0       | 0       | 0       |         |         |
|                                                                                                                                                                                                                                                                                   | 4                                          | 3                                 | 2       | 3       | 2       | 1       | 1       |         |         |
|                                                                                                                                                                                                                                                                                   | 6                                          | 5                                 | 4       | 5       | 7       | 7       | 6       |         |         |
|                                                                                                                                                                                                                                                                                   | P Value*                                   |                                   | 0.01    | 0.72    | 0.99    | 0.69    | 0.56    | 0.06    | 0.23    |
|                                                                                                                                                                                                                                                                                   | Patient off sedation at the time of<br>SBT | No. of observations available     |         | 18      | 29      | 32      | 39      | 40      | 38      |
| Inhaled Se-<br>dation<br>Group                                                                                                                                                                                                                                                    |                                            | Number of pa-<br>tients — no. (%) | 9 (60)  | 7 (47)  | 11 (61) | 13 (62) | 11 (53) | 17 (65) | 7 (44)  |
| Intravenous<br>Sedation<br>Group                                                                                                                                                                                                                                                  |                                            | Number of pa-<br>tients — no. (%) | 2 (67)  | 6 (43)  | 7 (50)  | 8 (44)  | 6 (32)  | 7 (58)  | 6 (33)  |
| P Value*                                                                                                                                                                                                                                                                          |                                            | 0.83                              | 0.84    | 0.53    | 0.28    | 0.18    | 0.68    | 0.53    |         |
| Pain assessment documented                                                                                                                                                                                                                                                        | No. of observations available              |                                   | 182     | 182     | 178     | 176     | 173     | 165     | 157     |
|                                                                                                                                                                                                                                                                                   | Inhaled Se-<br>dation<br>Group             | Number of pa-<br>tients — no. (%) | 52 (51) | 51 (51) | 52 (52) | 48 (49) | 51 (53) | 49 (53) | 46 (52) |

|                                                                                                                                                                                                           |                                                                                                                                                                                                                                      |                              |                              |                  |                  |         |         |                  |         |         |
|-----------------------------------------------------------------------------------------------------------------------------------------------------------------------------------------------------------|--------------------------------------------------------------------------------------------------------------------------------------------------------------------------------------------------------------------------------------|------------------------------|------------------------------|------------------|------------------|---------|---------|------------------|---------|---------|
|                                                                                                                                                                                                           | Intravenous Sedation Group                                                                                                                                                                                                           | Number of patients — no. (%) | 39 (48)                      | 43 (52)          | 43 (55)          | 45 (57) | 44 (58) | 41 (56)          | 35 (51) |         |
|                                                                                                                                                                                                           | P Value*                                                                                                                                                                                                                             |                              | 0.66                         | 0.85             | 0.68             | 0.23    | 0.49    | 0.71             | 0.98    |         |
| Agitation-sedation scale target                                                                                                                                                                           | No. of observations available                                                                                                                                                                                                        |                              | 184                          | 178              | 176              | 175     | 170     | 164              | 155     |         |
|                                                                                                                                                                                                           | Inhaled Sedation Group                                                                                                                                                                                                               | Number of patients — no. (%) | 55 (54)                      | 55 (56)          | 54 (55)          | 51 (53) | 51 (54) | 51 (55)          | 49 (56) |         |
|                                                                                                                                                                                                           | Intravenous Sedation Group                                                                                                                                                                                                           | Number of patients — no. (%) | 32 (39)                      | 32 (41)          | 29 (38)          | 29 (37) | 30 (40) | 26 (36)          | 25 (37) |         |
|                                                                                                                                                                                                           | P Value*                                                                                                                                                                                                                             |                              | 0.02                         | 0.05             | 0.03             | 0.13    | 0.08    | 0.01             | 0.02    |         |
|                                                                                                                                                                                                           | No. of observations available                                                                                                                                                                                                        |                              | 184                          | 181              | 178              | 177     | 172     | 164              | 157     |         |
| Agitation-sedation scale documented                                                                                                                                                                       | Inhaled Sedation Group                                                                                                                                                                                                               | Number of patients — no. (%) | 92 (91)                      | 92 (92)          | 92 (92)          | 90 (92) | 89 (92) | 84 (92)          | 81 (91) |         |
|                                                                                                                                                                                                           | Intravenous Sedation Group                                                                                                                                                                                                           | Number of patients — no. (%) | 63 (76)                      | 66 (81)          | 63 (81)          | 65 (82) | 62 (83) | 61 (84)          | 56 (82) |         |
|                                                                                                                                                                                                           | P Value*                                                                                                                                                                                                                             |                              | 0.01                         | 0.04             | 0.03             | 0.06    | 0.07    | 0.08             | 0.11    |         |
|                                                                                                                                                                                                           | No. of observations available                                                                                                                                                                                                        |                              | 170                          | 167              | 165              | 164     | 160     | 152              | 142     |         |
|                                                                                                                                                                                                           | Inhaled Sedation Group                                                                                                                                                                                                               | Number of patients — no. (%) | 27 (30)                      | 27 (31)          | 26 (30)          | 25 (29) | 25 (29) | 23 (28)          | 24 (31) |         |
| CAM-ICU documented                                                                                                                                                                                        | Intravenous Sedation Group                                                                                                                                                                                                           | Number of patients — no. (%) | 6 (7)                        | 4 (5)            | 4 (5)            | 6 (8)   | 7 (9)   | 4 (6)            | 5 (8)   |         |
|                                                                                                                                                                                                           | P Value*                                                                                                                                                                                                                             |                              | 10 <sup>-4</sup>             | 10 <sup>-4</sup> | 10 <sup>-4</sup> | 0.001   | 0.002   | 10 <sup>-4</sup> | 0.001   |         |
|                                                                                                                                                                                                           | No. of observations available                                                                                                                                                                                                        |                              | 167                          | 161              | 158              | 157     | 153     | 149              | 138     |         |
|                                                                                                                                                                                                           | Mobility safety screen passed<br>If not, reason<br>RASS -4/-5<br>FiO <sub>2</sub> >60%<br>PEEP >10 cmH <sub>2</sub> O<br>Myocardial ischemia (within 24h)<br>Arrhythmia (within 24h)<br>Increasing needs for vasopressors in last 2h | Inhaled Sedation Group       | Number of patients — no. (%) | 12 (14)          | 10 (12)          | 12 (15) | 13 (16) | 16 (21)          | 18 (23) | 20 (27) |
|                                                                                                                                                                                                           |                                                                                                                                                                                                                                      |                              |                              | 65               | 59               | 55      | 53      | 54               | 49      | 43      |
| 7                                                                                                                                                                                                         |                                                                                                                                                                                                                                      |                              |                              | 4                | 3                | 3       | 4       | 7                | 4       |         |
| 19                                                                                                                                                                                                        |                                                                                                                                                                                                                                      |                              |                              | 17               | 17               | 16      | 16      | 13               | 9       |         |
| 0                                                                                                                                                                                                         |                                                                                                                                                                                                                                      |                              |                              | 0                | 0                | 1       | 1       | 0                | 0       |         |
| 1                                                                                                                                                                                                         |                                                                                                                                                                                                                                      |                              |                              | 0                | 0                | 1       | 1       | 0                | 1       |         |
| 1                                                                                                                                                                                                         |                                                                                                                                                                                                                                      |                              |                              | 0                | 1                | 1       | 1       | 1                | 1       |         |
| Intravenous Sedation Group                                                                                                                                                                                |                                                                                                                                                                                                                                      | Number of patients — no. (%) | 8 (10)                       | 14 (18)          | 15 (19)          | 19 (24) | 16 (21) | 17 (24)          | 16 (25) |         |
|                                                                                                                                                                                                           | 60                                                                                                                                                                                                                                   |                              | 55                           | 50               | 43               | 43      | 41      | 33               |         |         |
|                                                                                                                                                                                                           | 4                                                                                                                                                                                                                                    |                              | 3                            | 4                | 6                | 3       | 4       | 3                |         |         |
|                                                                                                                                                                                                           | 26                                                                                                                                                                                                                                   |                              | 18                           | 19               | 20               | 15      | 13      | 12               |         |         |
|                                                                                                                                                                                                           | 0                                                                                                                                                                                                                                    |                              | 0                            | 0                | 0                | 0       | 0       | 0                |         |         |
|                                                                                                                                                                                                           | 0                                                                                                                                                                                                                                    |                              | 1                            | 0                | 0                | 1       | 1       | 1                |         |         |
|                                                                                                                                                                                                           | 3                                                                                                                                                                                                                                    |                              | 2                            | 2                | 2                | 1       | 1       | 2                |         |         |
|                                                                                                                                                                                                           | P Value*                                                                                                                                                                                                                             |                              | 0.42                         | 0.36             | 0.48             | 0.22    | 0.90    | 0.97             | 0.71    |         |
| Exercise or mobilization this day<br>If not, reason<br>Effect of sedative administration<br>No staff available<br>Patient/family refused<br>Patient off unit<br>Clinical team refused<br>Unknown<br>Other | No. of observations available                                                                                                                                                                                                        |                              | 172                          | 169              | 167              | 165     | 162     | 156              | 146     |         |
|                                                                                                                                                                                                           | Inhaled Sedation Group                                                                                                                                                                                                               | Number of patients — no. (%) | 20 (22)                      | 23 (26)          | 22 (25)          | 22 (25) | 25 (29) | 24 (25)          | 23 (29) |         |
|                                                                                                                                                                                                           |                                                                                                                                                                                                                                      |                              | 60                           | 57               | 53               | 53      | 51      | 47               | 43      |         |
|                                                                                                                                                                                                           |                                                                                                                                                                                                                                      |                              | 6                            | 6                | 7                | 6       | 5       | 7                | 6       |         |
|                                                                                                                                                                                                           |                                                                                                                                                                                                                                      |                              | 0                            | 0                | 0                | 0       | 0       | 0                | 0       |         |
|                                                                                                                                                                                                           |                                                                                                                                                                                                                                      |                              | 0                            | 0                | 0                | 0       | 0       | 0                | 0       |         |
|                                                                                                                                                                                                           |                                                                                                                                                                                                                                      |                              | 0                            | 0                | 1                | 0       | 0       | 1                | 1       |         |
|                                                                                                                                                                                                           |                                                                                                                                                                                                                                      |                              | 1                            | 1                | 2                | 3       | 2       | 2                | 2       |         |
|                                                                                                                                                                                                           |                                                                                                                                                                                                                                      |                              | 5                            | 3                | 4                | 2       | 3       | 3                | 4       |         |
|                                                                                                                                                                                                           | Intravenous Sedation Group                                                                                                                                                                                                           | Number of patients — no. (%) | 6 (7)                        | 9 (11.25)        | 9 (12)           | 14 (18) | 13 (17) | 13 (18)          | 12 (18) |         |
|                                                                                                                                                                                                           |                                                                                                                                                                                                                                      |                              | 59                           | 55               | 54               | 47      | 48      | 47               | 43      |         |
|                                                                                                                                                                                                           |                                                                                                                                                                                                                                      |                              | 5                            | 5                | 5                | 6       | 6       | 4                | 3       |         |
|                                                                                                                                                                                                           |                                                                                                                                                                                                                                      |                              | 0                            | 0                | 0                | 0       | 0       | 0                | 0       |         |
|                                                                                                                                                                                                           |                                                                                                                                                                                                                                      |                              | 0                            | 0                | 0                | 0       | 0       | 0                | 0       |         |
|                                                                                                                                                                                                           |                                                                                                                                                                                                                                      |                              | 0                            | 0                | 0                | 1       | 0       | 0                | 0       |         |
|                                                                                                                                                                                                           |                                                                                                                                                                                                                                      |                              | 1                            | 2                | 2                | 4       | 2       | 1                | 2       |         |
|                                                                                                                                                                                                           |                                                                                                                                                                                                                                      |                              | 4                            | 2                | 3                | 0       | 0       | 1                | 1       |         |
|                                                                                                                                                                                                           | P Value*                                                                                                                                                                                                                             |                              | 0.01                         | 0.02             | 0.03             | 0.25    | 0.09    | 0.12             | 0.14    |         |
| No. of observations available                                                                                                                                                                             |                                                                                                                                                                                                                                      | 18                           | 20                           | 21               | 24               | 24      | 24      | 23               |         |         |

|                                                                                                                                                                                             |                               |                              |                                    |                                     |                                     |                                    |                                      |                                     |                                    |
|---------------------------------------------------------------------------------------------------------------------------------------------------------------------------------------------|-------------------------------|------------------------------|------------------------------------|-------------------------------------|-------------------------------------|------------------------------------|--------------------------------------|-------------------------------------|------------------------------------|
| What was the highest level of mobilization performed?<br><i>Level 1: Active range of motion</i><br><i>Level 2: Dangle</i><br><i>Level 3: Active transfers</i><br><i>Level 4: March/walk</i> | Inhaled Sedation Group        | Number of patients — no. (%) | 12 (92)<br>0 (0)<br>1 (8)<br>0 (0) | 11 (85)<br>0 (0)<br>2 (15)<br>0 (0) | 10 (77)<br>1 (8)<br>2 (15)<br>0 (0) | 9 (75)<br>1 (8)<br>2 (17)<br>0 (0) | 10 (17)<br>2 (14)<br>2 (14)<br>0 (0) | 9 (64)<br>1 (7)<br>4 (29)<br>0 (0)  | 8 (62)<br>1 (8)<br>4 (31)<br>0 (0) |
|                                                                                                                                                                                             | Intravenous Sedation Group    | Number of patients — no. (%) | 5 (100)<br>0 (0)<br>0 (0)<br>0 (0) | 6 (86)<br>1 (14)<br>0 (0)<br>0 (0)  | 5 (63)<br>1 (13)<br>2 (25)<br>0 (0) | 8 (67)<br>0 (0)<br>3 (25)<br>1 (8) | 7 (70)<br>0 (0)<br>3 (30)<br>0 (0)   | 6 (60)<br>1 (10)<br>3 (30)<br>0 (0) | 8 (62)<br>0 (0)<br>2 (20)<br>0 (0) |
|                                                                                                                                                                                             | P Value*                      |                              | 0.52                               | 0.23                                | 0.78                                | 0.52                               | 0.35                                 | 0.96                                | 0.52                               |
|                                                                                                                                                                                             | No. of observations available |                              | 182                                | 178                                 | 176                                 | 173                                | 168                                  | 160                                 | 152                                |
|                                                                                                                                                                                             | Inhaled Sedation Group        | Number of patients — no. (%) | 5 (5)<br>76 (76)<br>19 (19)        | 3 (3)<br>76 (78)<br>18 (19)         | 3 (3)<br>74 (76)<br>20 (21)         | 5 (5)<br>70 (74)<br>20 (21)        | 4 (4)<br>71 (76)<br>18 (19)          | 3 (3)<br>69 (78)<br>16 (18)         | 2 (2)<br>64 (75)<br>19 (22)        |
| Visit from family members or proxies<br><i>Yes</i><br><i>No</i><br><i>Unknown</i>                                                                                                           | Intravenous Sedation Group    | Number of patients — no. (%) | 2 (2)<br>49 (60)<br>31 (38)        | 3 (4)<br>46 (57)<br>32 (40)         | 2 (3)<br>42 (53)<br>35 (44)         | 3 (4)<br>44 (56)<br>31 (40)        | 1 (1)<br>41 (55)<br>33 (44)          | 5 (7)<br>37 (51)<br>30 (42)         | 2 (3)<br>35 (52)<br>30 (45)        |
|                                                                                                                                                                                             | P Value*                      |                              | 0.02                               | 0.01                                | 0.003                               | 0.03                               | 0.002                                | 0.001                               | 0.01                               |

\* P values were calculated for comparisons between patients receiving inhaled sedation (for at least 24 hours) and those receiving only intravenous sedation through day 28. Percentages are expressed out of available individuals for each variable, and may not sum to 100% due to rounding. Quantitative variables are expressed as median [IQR], qualitative variables as number (%), unless specified otherwise. SAT: spontaneous awakening trial; SBT: spontaneous breathing trial. RASS: Richmond agitation and sedation scale; BPS: behavioral pain scale; BIS: bispectral index; CAM-ICU: confusion assessment method for the intensive care unit; FiO<sub>2</sub>: inspired fraction of oxygen; PEEP: positive end expiratory pressure.

## References

1. von Elm E, Altman DG, Egger M, Pocock SJ, Gøtzsche PC, Vandenbroucke JP, et al. The Strengthening the Reporting of Observational Studies in Epidemiology (STROBE) statement: guidelines for reporting observational studies. *J Clin Epidemiol*. 2008 Apr;61(4):344–9.
2. Harris PA, Taylor R, Thielke R, Payne J, Gonzalez N, Conde JG. Research electronic data capture (REDCap)—a metadata-driven methodology and workflow process for providing translational research informatics support. *J Biomed Inform*. 2009 Apr;42(2):377–81.
3. Devlin JW, Skrobik Y, Gélinas C, Needham DM, Slooter AJC, Pandharipande PP, et al. Clinical Practice Guidelines for the Prevention and Management of Pain, Agitation/Sedation, Delirium, Immobility, and Sleep Disruption in Adult Patients in the ICU. *Crit Care Med*. 2018 Sep;46(9):e825–73.
4. Bunn, A.; Korpela, M. An Introduction to dplR. Processed with dplR 1.7.2 in R version 4.0.3. 2013; Available from: <http://r.me-teo.uni.wroc.pl/web/packages/dplR/vignettes/intro-dplR.pdf>
5. Jabaudon M, Boucher P, Imhoff E, Chabanne R, Faure JS, Roszyk L, et al. Sevoflurane for Sedation in Acute Respiratory Distress Syndrome. A Randomized Controlled Pilot Study. *Am J Respir Crit Care Med*. 2017 Mar 15;195(6):792–800.
